# Supplementary material for: Cannabidiol enhances cytotoxicity of anti-cancer drugs in human head and neck squamous cell carcinoma
Source: Sci Rep. 2020 Nov 26;10:20622. doi: 10.1038/s41598-020-77674-y (PMC7692486; doi:10.1038/s41598-020-77674-y)
Supplement: Supplementary file 1 — Supplementary Table S1. [file 41598_2020_77674_MOESM1_ESM.xlsx]

## Sheet: cancer related genes
	Table S1. List of cancer-related genes in CBD treated FaDu and SCC15
				Fold change
	Gene symbol	Description	Function	FaDu+CBD	SCC15+CBD
1	KLF6	Kruppel-like_factor_6	tumor sup	23.145	9.373
2	DLC1	deleted_in_liver_cancer_1	tumor sup	7.711	1.223
3	AKT1	v-akt_murine_thymoma_viral_oncogene_homolog_1	oncogene	0.635	0.561
4	BLCAP	bladder_cancer_associated_protein	oncogene	0.542	0.877
5	BRCA2	breast_cancer_2__early_onset	DNA rep	0.539	0.455
6	CASC5	cancer_susceptibility_candidate_5	oncogene	0.534	0.515
7	CASP10	caspase_10__apoptosis-related_cysteine_peptidase	apotosis	0.494	0.267
8	CASP8	caspase_8__apoptosis-related_cysteine_peptidase	apotosis	0.724	0.729
9	CHEK2	checkpoint_kinase_2	apotosis	0.965	0.645
10	ELAC2	elaC_ribonuclease_Z_2	DNA rep	0.656	0.555
11	EPCAM	epithelial_cell_adhesion_molecule	oncogene	0.64	0.855
12	EPHB2	EPH_receptor_B2	oncogene	0.709	0.691
13	FH	fumarate_hydratase	migration	0.693	0.876
14	GALNT12	UDP-N-acetyl-alpha-D-galactosamine_polypeptide_N-acetylgalactosaminyltransferase_12__GalNAc-T12	oncogene	0.73	0.63			Oncogene
15	HIC2	hypermethylated_in_cancer_2	oncogene	0.544	0.815			Tumor suppressor gene
16	ERBB2	v-erb-b2_avian_erythroblastic_leukemia_viral_oncogene_homolog_2	oncogene	0.594	0.46			DNA repair-related gene
17	PMS2	PMS2_postmeiotic_segregation_increased_2__S._cerevisiae	DNA rep	0.451	0.46			Apoptosis-related gene
18	HRAS	Harvey_rat_sarcoma_viral_oncogene_homolog	oncogene	0.632	0.928			Growth factor-related gene
19	ORAOV1	oral_cancer_overexpressed_1	oncogene	0.484	0.7			cell migration-related gene
20	LDOC1	leucine_zipper__down-regulated_in_cancer_1	tumor sup	0.477	0.913			PI3K signaling-related gene
21	KRAS	Kirsten_rat_sarcoma_viral_oncogene_homolog	oncogene	0.836	0.737			overexpressed gene in tumor
22	LDOC1L	leucine_zipper__down-regulated_in_cancer_1-like	tumor sup	0.891	0.577
23	ATR	ataxia_telangiectasia_and_Rad3_related	DNA rep	0.605	0.439
24	LZTS1	leucine_zipper__putative_tumor_suppressor_1	tumor sup	0.507	0.387
25	MACC1	metastasis_associated_in_colon_cancer_1	oncogene	0.611	0.372
26	POLE	polymerase__DNA_directed__epsilon__catalytic_subunit	DNA rep	0.343	0.435
27	MSH3	mutS_homolog_3	DNA rep	0.848	0.919
28	MTHFD1	methylenetetrahydrofolate_dehydrogenase__NADP_dependent__1__methenyltetrahydrofolate_cyclohydrolase__formyltetrahydrofolate_synthetase	oncogene	0.545	0.607
29	NF1	neurofibromin_1	oncogene	0.85	0.56
30	NTPCR	nucleoside-triphosphatase__cancer-related	oncogene	0.62	0.662
31	BRIP1	BRCA1_interacting_protein_C-terminal_helicase_1	DNA rep	0.428	0.664
32	PALB2	partner_and_localizer_of_BRCA2	DNA rep	0.722	0.85
33	MSH2	mutS_homolog_2	DNA rep	0.263	0.41
34	PBOV1	prostate_and_breast_cancer_overexpressed_1	oncogene	0.643	1.083
35	PDGFRL	platelet-derived_growth_factor_receptor-like	growth	0.493	0.811
36	MSH6	mutS_homolog_6	DNA rep	0.267	0.409
37	BRMS1L	breast_cancer_metastasis-suppressor_1-like	tumor sup	0.422	0.484
38	PIK3CA	phosphatidylinositol-4_5-bisphosphate_3-kinase__catalytic_subunit_alpha	pi3k sig	1.037	0.77
39	VOPP1	vesicular__overexpressed_in_cancer__prosurvival_protein_1	oncogene	0.417	0.634
40	XRCC3	X-ray_repair_complementing_defective_repair_in_Chinese_hamster_cells_3	DNA rep	0.354	0.401
41	RAD51C	RAD51_paralog_C	DNA rep	0.639	0.4
42	MLH3	mutL_homolog_3	DNA rep	0.407	0.475
43	RAD51	RAD51_recombinase	DNA rep	0.386	0.395
44	APC	adenomatous_polyposis_coli	oncogene	0.517	0.393
45	PTEN	phosphatase_and_tensin_homolog	pi3k sig	0.693	0.97
46	RB1	retinoblastoma_1	oncogene	0.939	0.582
47	RET	ret_proto-oncogene	oncogene	0.898	0.678
48	RHBDF2	rhomboid_5_homolog_2__Drosophila	oncogene	0.651	0.827
49	RNASEL	ribonuclease_L__2p_5p-oligoisoadenylate_synthetase-dependent	DNA rep	0.418	0.356
50	SCAI	suppressor_of_cancer_cell_invasion	tumor sup	0.341	0.624
51	SDCCAG3	serologically_defined_colon_cancer_antigen_3	pi3k sig	0.772	0.796
52	SDCCAG8	serologically_defined_colon_cancer_antigen_8	pi3k sig	0.853	0.833
53	POLD1	polymerase__DNA_directed__delta_1__catalytic_subunit	DNA rep	0.324	0.368
54	TGFBR2	transforming_growth_factor__beta_receptor_II__70_80kDa	growth	0.818	0.867
55	TP53	tumor_protein_p53	tumor sup	0.823	0.726
56	BRCA1	breast_cancer_1__early_onset	DNA rep	0.383	0.276
57	FGFR3	fibroblast_growth_factor_receptor_3	growth	0.252	0.468
58	WRN	Werner_syndrome__RecQ_helicase-like	DNA rep	0.577	0.86
59	WWOX	WW_domain_containing_oxidoreductase	oncogene	0.636	0.617
60	PALLD	palladin__cytoskeletal_associated_protein	oncogene	0.827	0.075
