# Supplementary material for: Cannabidiol enhances cytotoxicity of anti-cancer drugs in human head and neck squamous cell carcinoma
Source: Sci Rep. 2020 Nov 26;10:20622. doi: 10.1038/s41598-020-77674-y (PMC7692486; doi:10.1038/s41598-020-77674-y)
Supplement: Supplementary file 2 — Supplementary Table S2. [file 41598_2020_77674_MOESM2_ESM.xlsx]

## Sheet: DNA repair
	Table SI 2. List of DEG (DNA repair_Cell cycle_Cell proliferation_Cell migration) in CBD treated FaDu and SCC15
			Fold change		Log2(normalized RC)
		Gene symbol	FaDu	SCC15	FaDu	SCC15	Entrez ID	Description	Gene ID	Chromosome	Transcript ID	Biotype	Protein ID
	1	ASF1A	1.294	0.497	5.75173	6.12377	25842	anti-silencing_function_1A_histone_chaperone	ASF1A	chr6	NM_014034	protein_coding	P19990
	2	ATR	0.605	0.439	4.95903	4.23335	545	ataxia_telangiectasia_and_Rad3_related	ATR	chr3	NM_001184	protein_coding	P6744
	3	AUNIP	0.771	0.458	4.69142	4.31535	79000	aurora_kinase_A_and_ninein_interacting_protein	AUNIP	chr1	NM_024037	protein_coding	P3562
	4	BACH1	3.058	1.563	2.67356	4.28607	571	BTB_and_CNC_homology_1__basic_leucine_zipper_transcription_factor_1	BACH1	chr21	NM_001186	protein_coding	P34065
	5	BLM	0.576	0.367	5.49771	4.70111	641	Bloom_syndrome__RecQ_helicase-like	BLM	chr15	NM_000057	protein_coding	P23998
	6	BRCA1	0.383	0.276	5.85235	4.46663	672	breast_cancer_1__early_onset	BRCA1	chr17	NM_007300	protein_coding	P1877
	7	BRCC3	0.423	0.334	4.08958	2.8486	79184	BRCA1_BRCA2-containing_complex__subunit_3	BRCC3	chrX	NM_024332	protein_coding	P35801
	8	CDC45	0.401	0.4	6.36228	5.04509	8318	cell_division_cycle_45	CDC45	chr22	NM_003504	protein_coding	P22168
	9	CDC7	0.383	0.342	5.31893	3.93612	8317	cell_division_cycle_7	CDC7	chr1	NM_001134419	protein_coding	P34249
	10	CDCA5	0.482	0.437	6.52712	5.47317	113130	cell_division_cycle_associated_5	CDCA5	chr11	NM_080668	protein_coding	P23155
	11	CDK1	0.852	0.382	6.2604	6.0297	983	cyclin-dependent_kinase_1	CDK1	chr10	NM_001786	protein_coding	P16373
	12	CDKN2D	0.293	0.98	5.41498	3.64455	1032	cyclin-dependent_kinase_inhibitor_2D__p19__inhibits_CDK4	CDKN2D	chr19	NM_001800	protein_coding	P19418
	13	CHAF1A	0.271	0.277	6.46865	4.58562	10036	chromatin_assembly_factor_1__subunit_A__p150	CHAF1A	chr19	NM_005483	protein_coding	P18491
	14	CHAF1B	0.313	0.289	5.4756	3.79764	8208	chromatin_assembly_factor_1__subunit_B__p60	CHAF1B	chr21	NM_005441	protein_coding	P30846
	15	COPS7B	0.597	0.442	6.29866	5.55526	64708	COP9_signalosome_subunit_7B	COPS7B	chr2	NM_022730	protein_coding	P23007
	16	CSNK1E	2.643	1.93	7.93819	9.34033	1454	casein_kinase_1__epsilon	CSNK1E	chr22	NM_001894	protein_coding	P8933
	17	DCLRE1B	0.437	0.399	4.88269	3.68997	64858	DNA_cross-link_repair_1B	DCLRE1B	chr1	NM_022836	protein_coding	P4646
	18	DDB2	0.428	0.329	6.08664	4.86364	1643	damage-specific_DNA_binding_protein_2__48kDa	DDB2	chr11	NM_000107	protein_coding	P23197
	19	DDX11	0.325	0.393	6.63904	5.01859	1663	DEAD_H__Asp-Glu-Ala-Asp_His__box_helicase_11	DDX11	chr12	NM_152438	protein_coding	P25539
	20	DTL	0.231	0.333	6.49635	4.37921	51514	denticleless_E3_ubiquitin_protein_ligase_homolog__Drosophila	DTL	chr1	NM_016448	protein_coding	P26225
	21	EID3	3.313	1.342	6.26684	7.99505	493861	EP300_interacting_inhibitor_of_differentiation_3	EID3	chr12	NM_001008394	protein_coding	P2695
	22	ENDOV	0.656	0.442	4.42553	3.81824	284131	endonuclease_V	ENDOV	chr17	NM_173627	protein_coding	P15761
	23	ERCC4	0.506	0.451	4.24572	3.26364	2072	excision_repair_cross-complementing_rodent_repair_deficiency__complementation_group_4	ERCC4	chr16	NM_005236	protein_coding	P16875
	24	ESCO2	0.602	0.226	5.57595	4.84363	157570	establishment_of_sister_chromatid_cohesion_N-acetyltransferase_2	ESCO2	chr8	NM_001017420	protein_coding	P33979
	25	EXD2	0.393	0.742	4.25437	2.90747	55218	exonuclease_3p-5p_domain_containing_2	EXD2	chr14	NM_001193361	protein_coding	P3205
	26	FANCG	0.449	0.312	5.84087	4.68437	2189	Fanconi_anemia__complementation_group_G	FANCG	chr9	NM_004629	protein_coding	P4514
	27	FANCI	0.528	0.441	6.0646	5.14229	55215	Fanconi_anemia__complementation_group_I	FANCI	chr15	NM_001113378	protein_coding	P12258
	28	FANCL	0.317	0.362	4.72928	3.07108	55120	Fanconi_anemia__complementation_group_L	FANCL	chr2	NM_018062	protein_coding	P29345
	29	FEN1	0.186	0.156	6.56424	4.13816	2237	flap_structure-specific_endonuclease_1	FEN1	chr11	NM_004111	protein_coding	P23777
	30	FZR1	1.139	0.398	4.52926	4.71765	51343	fizzy_cell_division_cycle_20_related_1__Drosophila	FZR1	chr19	NM_001136198	protein_coding	P19122
	31	GADD45A	17.101	3.591	5.44559	9.5416	1647	growth_arrest_and_DNA-damage-inducible__alpha	GADD45A	chr1	NM_001924	protein_coding	P30253
	32	GEN1	0.494	0.312	4.08958	3.07108	348654	GEN1_Holliday_junction_5p_flap_endonuclease	GEN1	chr2	NM_182625	protein_coding	P13412
	33	GTF2H2	0.486	0.607	5.40722	4.36527	2966	general_transcription_factor_IIH__polypeptide_2__44kDa	GTF2H2	chr5	NM_001515	protein_coding	P15039
	34	H2AFX	0.289	0.254	7.40213	5.60949	3014	H2A_histone_family__member_X	H2AFX	chr11	NM_002105	protein_coding	P1448
	35	HIST1H4A	0.998	0.159	7.9969	7.99335	8359	histone_cluster_1__H4a	HIST1H4A	chr6	NM_003538	protein_coding	P15156
	36	HMGA2	2.973	1.37	3.03756	4.60946	8091	high_mobility_group_AT-hook_2	HMGA2	chr12	NM_003483	protein_coding	P5264
	37	INIP	0.675	0.384	5.15251	4.58562	58493	INTS3_and_NABP_interacting_protein	INIP	chr9	NM_021218	protein_coding	P1895
	38	INTS3	0.672	0.498	6.58846	6.01415	65123	integrator_complex_subunit_3	INTS3	chr1	NM_023015	protein_coding	P9602
	39	KIF22	0.758	0.395	5.45694	5.05814	3835	kinesin_family_member_22	KIF22	chr16	NM_007317	protein_coding	P17114
	40	LIG1	0.303	0.299	6.42704	4.70664	3978	ligase_I__DNA__ATP-dependent	LIG1	chr19	NM_000234	protein_coding	P5753
	41	MDC1	0.883	0.479	6.11072	5.93142	9656	mediator_of_DNA-damage_checkpoint_1	MDC1	chr6	NM_014641	protein_coding	P10433
	42	MEN1	0.703	0.385	4.9159	4.40667	4221	multiple_endocrine_neoplasia_I	MEN1	chr11	NM_000244	protein_coding	P22051
	43	MLH3	0.407	0.475	5.86938	4.57356	27030	mutL_homolog_3	MLH3	chr14	NM_001040108	protein_coding	P21344
	44	MMS22L	0.3	0.293	4.64599	2.90747	253714	MMS22-like__DNA_repair_protein	MMS22L	chr6	NM_198468	protein_coding	P27805
	45	MRE11A	0.425	0.481	5.19818	3.96412	4361	MRE11_meiotic_recombination_11_homolog_A__S._cerevisiae	MRE11A	chr11	NM_005591		P31590
	46	MSH2	0.263	0.41	5.09567	3.17057	4436	mutS_homolog_2	MSH2	chr2	NM_000251	protein_coding	P18814
	47	MSH5	0.47	0.632	4.94837	3.85868	4439	mutS_homolog_5	MSH5	chr6	NM_172165	protein_coding	P21368
	48	MSH6	0.267	0.409	6.16005	4.25618	2956	mutS_homolog_6	MSH6	chr2	NM_000179	protein_coding	P25500
	49	NCOA6	0.904	0.443	6.6274	6.48128	23054	nuclear_receptor_coactivator_6	NCOA6	chr20	NM_014071	protein_coding	P4910
	50	NSMCE4A	0.605	0.431	5.11011	4.38612	54780	non-SMC_element_4_homolog_A__S._cerevisiae	NSMCE4A	chr10	NM_017615	protein_coding	P32139
	51	OGG1	0.376	0.841	4.69142	3.27858	4968	8-oxoguanine_DNA_glycosylase	OGG1	chr3	NM_016820	protein_coding	P11523
	52	ORAOV1	0.484	0.7	8.50764	7.45931	220064	oral_cancer_overexpressed_1	ORAOV1	chr11	NM_153451	protein_coding	P25524
	53	PAPD7	0.629	0.372	4.85444	4.1865	11044	PAP_associated_domain_containing_7	PAPD7	chr5	NM_006999	protein_coding	P16912
	54	PARP1	0.341	0.469	8.40518	6.8537	142	poly__ADP-ribose__polymerase_1	PARP1	chr1	NM_001618	protein_coding	P20733
	55	PARP2	0.703	0.464	5.92208	5.41346	10038	poly__ADP-ribose__polymerase_2	PARP2	chr14	NM_005484	protein_coding	P11940
	56	PARP9	0.376	0.424	4.64599	3.23327	83666	poly__ADP-ribose__polymerase_family__member_9	PARP9	chr3	NM_031458	protein_coding	P21722
	57	PAXIP1	0.48	0.465	5.72699	4.66744	22976	PAX_interacting__with_transcription-activation_domain__protein_1	PAXIP1	chr7	NM_007349	protein_coding	P32269
	58	PMS2	0.451	0.46	4.73552	3.58556	5395	PMS2_postmeiotic_segregation_increased_2__S._cerevisiae	PMS2	chr7	NM_000535	protein_coding	P8593
	59	POLD1	0.324	0.368	5.83509	4.21016	5424	polymerase__DNA_directed__delta_1__catalytic_subunit	POLD1	chr19	NM_002691	protein_coding
	60	POLE	0.343	0.435	6.72897	5.18654	5426	polymerase__DNA_directed__epsilon__catalytic_subunit	POLE	chr12	NM_006231	protein_coding	P35377
	61	PPP5C	0.429	0.726	7.00704	5.78728	5536	protein_phosphatase_5__catalytic_subunit	PPP5C	chr19	NM_006247	protein_coding	P26996
	62	PTTG1	0.715	0.436	5.25119	4.76622	9232	pituitary_tumor-transforming_1	PTTG1	chr5	NM_004219	protein_coding	P17295
	63	RAD18	0.245	0.564	4.20148	2.17057	56852	RAD18_homolog__S._cerevisiae	RAD18	chr3	NM_020165	protein_coding	P17959
	64	RAD51	0.386	0.395	5.72389	4.35113	5888	RAD51_recombinase	RAD51	chr15	NM_002875	protein_coding	P14674
	65	RAD51C	0.639	0.4	4.9322	4.28607	5889	RAD51_paralog_C	RAD51C	chr17	NM_058216	protein_coding
	66	RAD52	2.678	0.756	3.97874	5.39985	5893	RAD52_homolog__S._cerevisiae	RAD52	chr12	NM_134424	protein_coding	P33130
	67	RAD9A	0.475	0.632	5.22052	4.14633	5883	RAD9_homolog_A__S._pombe	RAD9A	chr11	NM_004584	protein_coding	P14736
	68	REC8	0.286	0.742	4.94298	3.13816	9985	REC8_meiotic_recombination_protein	REC8	chr14	NM_001048205	protein_coding	P16201
	69	RECQL4	0.231	0.456	4.87711	2.76617	9401	RecQ_protein-like_4	RECQL4	chr8	NM_004260	protein_coding	P35575
	70	REV3L	1.354	0.448	4.86012	5.29715	5980	REV3-like__polymerase__DNA_directed__zeta__catalytic_subunit	REV3L	chr6	NM_002912	protein_coding	P29499
	71	RFC3	0.388	0.58	5.8946	4.53051	5983	replication_factor_C__activator_1__3__38kDa	RFC3	chr13	NM_002915	protein_coding	P25977
	72	RFC4	0.339	0.476	5.88904	4.32977	5984	replication_factor_C__activator_1__4__37kDa	RFC4	chr3	NM_002916	protein_coding	P18930
	73	RIF1	0.222	0.417	5.32308	3.15445	55183	RAP1_interacting_factor_homolog__yeast	RIF1	chr2	NM_018151	protein_coding	P22970
	74	RPA1	0.435	0.433	7.51567	6.31539	6117	replication_protein_A1__70kDa	RPA1	chr17	NM_002945	protein_coding	P17024
	75	SMC1A	0.525	0.422	7.34741	6.41854	8243	structural_maintenance_of_chromosomes_1A	SMC1A	chrX	NM_006306	protein_coding	P21119
	76	SMC5	0.355	0.529	4.28014	2.78722	23137	structural_maintenance_of_chromosomes_5	SMC5	chr9	NM_015110	protein_coding	P18210
	77	SPRTN	0.456	0.44	5.03148	3.89792	83932	SprT-like_N-terminal_domain	SPRTN	chr1	NM_032018	protein_coding	P14644
	78	TDP1	0.646	0.429	6.16467	5.53363	55775	tyrosyl-DNA_phosphodiesterase_1	TDP1	chr14	NM_001008744	protein_coding	P25374
	79	TICRR	0.24	0.355	6.44989	4.393	90381	TOPBP1-interacting_checkpoint_and_replication_regulator	TICRR	chr15	NM_152259	protein_coding	P9274
	80	TONSL	0.34	0.374	5.12912	3.5735	4796	,tonsoku-like__DNA_repair_protein	TONSL	chr8	NM_013432	protein_coding	P33150
	81	TRIP13	0.459	0.658	7.10266	5.97797	9319	thyroid_hormone_receptor_interactor_13	TRIP13	chr5	NM_004237	protein_coding	P23211
	82	TRRAP	0.75	0.462	6.75059	6.33519	8295	transformation_transcription_domain-associated_protein	TRRAP	chr7	NM_003496	protein_coding	P2167
	83	UBE2T	0.404	0.376	7.56534	6.25809	29089	ubiquitin-conjugating_enzyme_E2T__putative	UBE2T	chr1	NM_014176	protein_coding	P16516
	84	UNG	0.333	0.352	7.42344	5.8361	7374	uracil-DNA_glycosylase	UNG	chr12	NM_080911	protein_coding	P32833
	85	USP1	0.41	0.598	5.61689	4.32977	7398	ubiquitin_specific_peptidase_1	USP1	chr1	NM_001017416	protein_coding	P28729
	86	XRCC3	0.354	0.401	6.18068	4.68437	7517	X-ray_repair_complementing_defective_repair_in_Chinese_hamster_cells_3	XRCC3	chr14	NM_001100118	protein_coding	P30635
	87	ZFYVE26	0.598	0.432	6.58675	5.84617	23503	zinc_finger__FYVE_domain_containing_26	ZFYVE26	chr14	NM_015346	protein_coding	P4641
	88	ZNF830	0.812	0.423	4.36268	4.06247	91603	zinc_finger_protein_830	ZNF830	chr17	NM_052857	protein_coding	P8009
	89	ZRANB3	0.441	0.332	4.03016	2.8486	84083	zinc_finger__RAN-binding_domain_containing_3	ZRANB3	chr2	NM_032143	protein_coding	P16641

## Sheet: Cell cycle
			Fold change		Log2(normalized RC)
		Gene symbol	FaDu	SCC15	FaDu	SCC15	Entrez ID	Description	Gene ID	Chromosome	Transcript ID	Biotype	Protein ID
	1	AHR	2.694	1.092	3.24336	4.6731	196	aryl_hydrocarbon_receptor	AHR	chr7	NM_001621	protein_coding	P11108
	2	AKAP8	0.523	0.463	6.0939	5.15854	10270	A_kinase__PRKA__anchor_protein_8	AKAP8	chr19	NM_005858	protein_coding	P22860
	3	ANAPC2	0.587	0.325	5.37173	4.60354	29882	anaphase_promoting_complex_subunit_2	ANAPC2	chr9	NM_013366	protein_coding	P18007
	4	ANLN	0.661	0.372	7.58009	6.98369	54443	anillin__actin_binding_protein	ANLN	chr7	NM_018685	protein_coding	P34291
	5	APBB2	4.545	0.955	4.69783	6.88212	323	amyloid_beta__A4__precursor_protein-binding__family_B__member_2	APBB2	chr4	NM_004307	protein_coding	P33074
	6	APC	0.517	0.393	5.75478	4.80287	324	adenomatous_polyposis_coli	APC	chr5	NM_000038	protein_coding	P18457
	7	ARHGEF2	3.927	2.644	3.67694	5.65031	9181	Rho_Rac_guanine_nucleotide_exchange_factor__GEF__2	ARHGEF2	chr1	NM_001162383	protein_coding	P10550
	8	ASPM	0.316	0.344	5.53023	3.86859	259266	asp__abnormal_spindle__homolog__microcephaly_associated__Drosophila	ASPM	chr1	NM_018136	protein_coding	P13174
	9	ATR	0.605	0.439	4.95903	4.23335	545	ataxia_telangiectasia_and_Rad3_related	ATR	chr3	NM_001184	protein_coding	P6744
	10	AUNIP	0.771	0.458	4.69142	4.31535	79000	aurora_kinase_A_and_ninein_interacting_protein	AUNIP	chr1	NM_024037	protein_coding	P3562
	11	AURKA	0.662	0.397	4.69142	4.0966	6790	aurora_kinase_A	AURKA	chr20	NM_003600	protein_coding	P28685
	12	AURKB	0.879	0.421	4.57852	4.393	9212	aurora_kinase_B	AURKB	chr17	NM_004217	protein_coding	P22134
	13	BACH1	3.058	1.563	2.67356	4.28607	571	BTB_and_CNC_homology_1__basic_leucine_zipper_transcription_factor_1	BACH1	chr21	NM_001186	protein_coding	P34065
	14	BCAT1	2.547	0.941	5.6665	7.01527	586	branched_chain_amino-acid_transaminase_1__cytosolic	BCAT1	chr12	NM_001178093	protein_coding	P25099
	15	BIN3	0.868	0.424	4.79025	4.58562	55909	bridging_integrator_3	BIN3	chr8	NM_018688	protein_coding	P14395
	16	BIRC3	1.879	4.971	2.32366	3.23327	330	baculoviral_IAP_repeat_containing_3	BIRC3	chr11	NM_182962	protein_coding	P32310
	17	BLM	0.576	0.367	5.49771	4.70111	641	Bloom_syndrome__RecQ_helicase-like	BLM	chr15	NM_000057	protein_coding	P23998
	18	BRCA1	0.383	0.276	5.85235	4.46663	672	breast_cancer_1__early_onset	BRCA1	chr17	NM_007300	protein_coding	P1877
	19	BRCC3	0.423	0.334	4.08958	2.8486	79184	BRCA1_BRCA2-containing_complex__subunit_3	BRCC3	chrX	NM_024332	protein_coding	P35801
	20	BUB1	0.838	0.478	5.33949	5.08389	699	BUB1_mitotic_checkpoint_serine_threonine_kinase	BUB1	chr2	NM_004336	protein_coding	P23441
	21	BUB1B	0.813	0.405	5.9912	5.69279	701	BUB1_mitotic_checkpoint_serine_threonine_kinase_B	BUB1B	chr15	NM_001211	protein_coding	P34259
	22	CAMK2G	0.396	0.546	4.89942	3.56133	818	calcium_calmodulin-dependent_protein_kinase_II_gamma	CAMK2G	chr10	NM_172171	protein_coding	P13886
	23	CASP2	0.446	0.406	6.94674	5.78204	835	caspase_2__apoptosis-related_cysteine_peptidase	CASP2	chr7	NM_032982	protein_coding	P21254
	24	CASP8AP2	0.202	0.534	4.94298	2.63297	9994	caspase_8_associated_protein_2	CASP8AP2	chr6	NM_001137668	protein_coding	P26910
	25	CCNA1	3.344	1.884	4.34653	6.08816	8900	cyclin_A1	CCNA1	chr13	NM_003914	protein_coding	P17947
	26	CCNA2	0.509	0.475	6.2754	5.30082	890	cyclin_A2	CCNA2	chr4	NM_001237	protein_coding	P26656
	27	CCNB1	0.962	0.466	6.90601	6.84995	891	cyclin_B1	CCNB1	chr5	NM_031966	protein_coding	P13742
	28	CCNB2	0.906	0.445	7.36254	7.22083	9133	cyclin_B2	CCNB2	chr15	NM_004701	protein_coding	P13959
	29	CCND1	0.383	0.828	10.0317	8.64528	595	cyclin_D1	CCND1	chr11	NM_053056	protein_coding	P23745
	30	CCND2	2.187	0.562	5.01114	6.14025	894	cyclin_D2	CCND2	chr12	NM_001759	protein_coding	P7032
	31	CCND3	0.466	0.693	5.65016	4.54911	896	cyclin_D3	CCND3	chr6	NM_001760	protein_coding	P2045
	32	CCNE1	0.217	1.268	4.20148	2.00036	898	cyclin_E1	CCNE1	chr19	NM_001238	protein_coding	P20022
	33	CCNF	0.514	0.134	4.09921	3.13816	899	cyclin_F	CCNF	chr16	NM_001761	protein_coding	P27552
	34	CCP110	0.428	0.315	5.36377	4.13816	9738	centriolar_coiled_coil_protein_110kDa	CCP110	chr16	NM_001199022	protein_coding	P22259
	35	CDC123	0.473	0.593	8.0657	6.9871	8872	cell_division_cycle_123	CDC123	chr10	NM_006023	protein_coding	P32436
	36	CDC14A	1.377	0.355	3.03756	3.49889	8556	cell_division_cycle_14A	CDC14A	chr1	NM_033312	protein_coding	P35731
	37	CDC45	0.401	0.4	6.36228	5.04509	8318	cell_division_cycle_45	CDC45	chr22	NM_003504	protein_coding	P22168
	38	CDC6	0.529	0.413	7.45297	6.5352	990	cell_division_cycle_6	CDC6	chr17	NM_001254	protein_coding	P11851
	39	CDC7	0.383	0.342	5.31893	3.93612	8317	cell_division_cycle_7	CDC7	chr1	NM_001134419	protein_coding	P34249
	40	CDCA2	0.682	0.353	5.24249	4.68997	157313	cell_division_cycle_associated_2	CDCA2	chr8	NM_152562	protein_coding	P33931
	41	CDCA3	0.679	0.256	5.42653	4.86859	83461	cell_division_cycle_associated_3	CDCA3	chr12	NM_031299	protein_coding	P9156
	42	CDCA5	0.482	0.437	6.52712	5.47317	113130	cell_division_cycle_associated_5	CDCA5	chr11	NM_080668	protein_coding	P23155
	43	CDCA8	0.935	0.425	4.6526	4.55526	55143	cell_division_cycle_associated_8	CDCA8	chr1	NM_018101	protein_coding	P9408
	44	CDK1	0.852	0.382	6.2604	6.0297	983	cyclin-dependent_kinase_1	CDK1	chr10	NM_001786	protein_coding	P16373
	45	CDK5	0.611	0.451	5.49771	4.78728	1020	cyclin-dependent_kinase_5	CDK5	chr7	NM_004935	protein_coding	P12612
	46	CDK5RAP2	0.777	0.465	5.76697	5.40327	55755	CDK5_regulatory_subunit_associated_protein_2	CDK5RAP2	chr9	NM_018249	protein_coding	P19918
	47	CDKN1A	10.355	2.541	5.68269	9.0549	1026	cyclin-dependent_kinase_inhibitor_1A__p21__Cip1	CDKN1A	chr6	NM_078467	protein_coding	P18697
	48	CDKN2C	0.293	0.184	5.2555	3.48607	1031	cyclin-dependent_kinase_inhibitor_2C__p18__inhibits_CDK4	CDKN2C	chr1	NM_078626	protein_coding	P35085
	49	CDKN2D	0.293	0.98	5.41498	3.64455	1032	cyclin-dependent_kinase_inhibitor_2D__p19__inhibits_CDK4	CDKN2D	chr19	NM_001800	protein_coding	P19418
	50	CDKN3	0.825	0.463	7.24879	6.97108	1033	cyclin-dependent_kinase_inhibitor_3	CDKN3	chr14	NM_005192	protein_coding	P35411
	51	CDT1	0.186	0.406	5.67299	3.24853	81620	chromatin_licensing_and_DNA_replication_factor_1	CDT1	chr16	NM_030928	protein_coding	P19950
	52	CENPI	0.479	0.256	3.62433	2.5612	2491	centromere_protein_I	CENPI	chrX	NM_006733	protein_coding	P17816
	53	CENPJ	0.424	0.263	5.02645	3.78722	55835	centromere_protein_J	CENPJ	chr13	NM_018451	protein_coding	P26498
	54	CENPK	0.278	0.405	4.05024	2.20226	64105	centromere_protein_K	CENPK	chr5	NM_022145	protein_coding	P19796
	55	CENPM	0.459	0.357	5.75785	4.63297	79019	centromere_protein_M	CENPM	chr22	NM_024053	protein_coding	P33089
	56	CENPO	0.524	0.357	4.16519	3.23327	79172	centromere_protein_O	CENPO	chr2	NM_024322	protein_coding	P30675
	57	CENPP	0.433	0.412	4.39445	3.1865	401541	centromere_protein_P	CENPP	chr9	NM_001012267	protein_coding	P25278
	58	CEP250	0.545	0.436	5.53736	4.66175	11190	centrosomal_protein_250kDa	CEP250	chr20	NM_007186	protein_coding	P27524
	59	CEP41	0.862	0.457	4.98532	4.77152	95681	centrosomal_protein_41kDa	CEP41	chr7	NM_018718	protein_coding	P33369
	60	CHAF1A	0.271	0.277	6.46865	4.58562	10036	chromatin_assembly_factor_1__subunit_A__p150	CHAF1A	chr19	NM_005483	protein_coding	P18491
	61	CHAF1B	0.313	0.289	5.4756	3.79764	8208	chromatin_assembly_factor_1__subunit_B__p60	CHAF1B	chr21	NM_005441	protein_coding	P30846
	62	CHAMP1	0.582	0.461	4.20148	3.42021	283489	chromosome_alignment_maintaining_phosphoprotein_1	CHAMP1	chr13	NM_001164144	protein_coding	P30353
	63	CHMP4C	2.012	1.468	4.52212	5.53051	92421	charged_multivesicular_body_protein_4C	CHMP4C	chr8	NM_152284	protein_coding	P19450
	64	CIT	0.821	0.426	6.14613	5.86116	11113	citron__rho-interacting__serine_threonine_kinase_21	CIT	chr12	NM_001206999	protein_coding	P4703
	65	CNTROB	0.915	0.331	4.49307	4.36527	116840	centrobin__centrosomal_BRCA2_interacting_protein	CNTROB	chr17	NM_001037144	protein_coding	P17338
	66	CSNK1E	2.643	1.93	7.93819	9.34033	1454	casein_kinase_1__epsilon	CSNK1E	chr22	NM_001894	protein_coding	P8933
	67	CUL3	0.338	0.599	6.72117	5.15449	8452	cullin_3	CUL3	chr2	NM_003590	protein_coding	P12422
	68	DAB2IP	0.5	0.478	6.78695	5.78728	153090	DAB2_interacting_protein	DAB2IP	chr9	NM_032552	protein_coding	P7062
	69	DBF4B	0.868	0.398	5.61353	5.41007	80174	DBF4_homolog_B__S._cerevisiae	DBF4B	chr17	NM_145663	protein_coding
	70	DDIT3	2.91	11.726	2.03245	3.5735	1649	DNA-damage-inducible_transcript_3	DDIT3	chr12	NM_001195054	protein_coding	P8407
	71	DDX11	0.325	0.393	6.63904	5.01859	1663	DEAD_H__Asp-Glu-Ala-Asp_His__box_helicase_11	DDX11	chr12	NM_152438	protein_coding	P25539
	72	DHFR	0.384	0.44	6.65388	5.2712	1719	dihydrofolate_reductase	DHFR	chr5	NM_000791	protein_coding	P2967
	73	DLGAP5	0.763	0.367	7.24771	6.85743	9787	discs__large__Drosophila__homolog-associated_protein_5	DLGAP5	chr14	NM_014750	protein_coding	P28518
	74	DONSON	0.277	0.512	6.20776	4.35819	29980	downstream_neighbor_of_SON	DONSON	chr21	NM_017613	protein_coding	P12396
	75	DSN1	0.285	0.451	6.57812	4.76622	79980	DSN1__MIS12_kinetochore_complex_component	DSN1	chr20	NM_024918	protein_coding	P10404
	76	DUSP1	244.267	41.038	2.69911	10.6314	1843	dual_specificity_phosphatase_1	DUSP1	chr5	NM_004417	protein_coding	P6592
	77	E2F1	0.135	0.513	7.0723	4.1865	1869	E2F_transcription_factor_1	E2F1	chr20	NM_005225	protein_coding	P27809
	78	E2F2	0.124	0.33	4.0098	1	1870	E2F_transcription_factor_2	E2F2	chr1	NM_004091	protein_coding	P8942
	79	ECT2	0.564	0.474	6.43851	5.61244	1894	epithelial_cell_transforming_sequence_2_oncogene	ECT2	chr3	NM_018098	protein_coding	P9731
	80	EID1	0.435	0.438	7.47262	6.27309	23741	EP300_interacting_inhibitor_of_differentiation_1	EID1	chr15	NM_014335	protein_coding	P32293
	81	EIF4EBP1	2.728	1.542	4.76617	6.21405	1978	eukaryotic_translation_initiation_factor_4E_binding_protein_1	EIF4EBP1	chr8	NM_004095	protein_coding	P30546
	82	ERCC6L	0.373	0.21	4.68504	3.26364	54821	excision_repair_cross-complementing_rodent_repair_deficiency__complementation_group_6-like	ERCC6L	chrX	NM_017669	protein_coding	P8841
	83	EREG	2.699	3.07	5.73942	7.17163	2069	epiregulin	EREG	chr4	NM_001432	protein_coding	P22210
	84	ERN1	3.966	2.647	3.46897	5.45684	2081	endoplasmic_reticulum_to_nucleus_signaling_1	ERN1	chr17	NM_001433	protein_coding	P8588
	85	ESCO2	0.602	0.226	5.57595	4.84363	157570	establishment_of_sister_chromatid_cohesion_N-acetyltransferase_2	ESCO2	chr8	NM_001017420	protein_coding	P33979
	86	ESPL1	0.463	0.453	5.4494	4.33693	9700	extra_spindle_pole_bodies_homolog_1__S._cerevisiae	ESPL1	chr12	NM_012291	protein_coding	P329
	87	EZH2	0.947	0.479	6.56598	6.48773	2146	enhancer_of_zeste_homolog_2__Drosophila	EZH2	chr7	NM_004456	protein_coding	P23388
	88	FAM83D	0.789	0.459	5.93024	5.58865	81610	family_with_sequence_similarity_83__member_D	FAM83D	chr20	NM_030919	protein_coding	P33640
	89	FANCI	0.528	0.441	6.0646	5.14229	55215	Fanconi_anemia__complementation_group_I	FANCI	chr15	NM_001113378	protein_coding	P12258
	90	FBXL15	0.458	0.67	4.28014	3.15445	79176	F-box_and_leucine-rich_repeat_protein_15	FBXL15	chr10	NM_024326	protein_coding	P36111
	91	FBXO5	0.432	0.439	4.0798	2.86849	26271	F-box_protein_5	FBXO5	chr6	NM_012177	protein_coding	P20205
	92	FEN1	0.186	0.156	6.56424	4.13816	2237	flap_structure-specific_endonuclease_1	FEN1	chr11	NM_004111	protein_coding	P23777
	93	FIGNL1	0.589	0.487	5.85519	5.09238	63979	fidgetin-like_1	FIGNL1	chr7	NM_001042762	protein_coding	P1380
	94	FZR1	1.139	0.398	4.52926	4.71765	51343	fizzy_cell_division_cycle_20_related_1__Drosophila	FZR1	chr19	NM_001136198	protein_coding	P19122
	95	GADD45A	17.101	3.591	5.44559	9.5416	1647	growth_arrest_and_DNA-damage-inducible__alpha	GADD45A	chr1	NM_001924	protein_coding	P30253
	96	GINS1	0.266	0.402	4.98012	3.07108	9837	GINS_complex_subunit_1__Psf1_homolog	GINS1	chr20	NM_021067	protein_coding	P2100
	97	GPSM2	0.686	0.443	4.8883	4.34405	29899	G-protein_signaling_modulator_2	GPSM2	chr1	NM_013296	protein_coding	P19411
	98	H2AFX	0.289	0.254	7.40213	5.60949	3014	H2A_histone_family__member_X	H2AFX	chr11	NM_002105	protein_coding	P1448
	99	HAUS5	0.496	0.487	5.82347	4.81317	23354	HAUS_augmin-like_complex__subunit_5	HAUS5	chr19	NM_015302	protein_coding	P24963
	100	HJURP	0.608	0.331	6.88102	6.16257	55355	Holliday_junction_recognition_protein	HJURP	chr2	NM_018410	protein_coding	P29575
	101	HMGA2	2.973	1.37	3.03756	4.60946	8091	high_mobility_group_AT-hook_2	HMGA2	chr12	NM_003483	protein_coding	P5264
	102	HRSP12	0.422	0.577	5.90014	4.65604		heat-responsive_protein_12	HRSP12	chr8	NM_005836		P27614
	103	HSPA2	0.201	0.352	5.33539	3.01846	3306	heat_shock_70kDa_protein_2	HSPA2	chr14	NM_021979	protein_coding	P5284
	104	INCENP	0.718	0.299	7.05874	6.58114	3619	inner_centromere_protein_antigens_135_155kDa	INCENP	chr11	NM_001040694	protein_coding	P9211
	105	INHBA	4.254	5.069	0.543991	2.63297	3624	inhibin__beta_A	INHBA	chr7	NM_002192	protein_coding	P20869
	106	INTS3	0.672	0.498	6.58846	6.01415	65123	integrator_complex_subunit_3	INTS3	chr1	NM_023015	protein_coding	P9602
	107	IRF1	0.441	4.092	5.85519	4.6731	3659	interferon_regulatory_factor_1	IRF1	chr5	NM_002198	protein_coding	P7691
	108	JAG2	0.272	0.399	7.23461	5.35822	3714	jagged_2	JAG2	chr14	NM_145159	protein_coding	P12156
	109	KIF11	0.573	0.286	5.23814	4.43363	3832	kinesin_family_member_11	KIF11	chr10	NM_004523	protein_coding	P14960
	110	KIF18A	0.616	0.485	4.37865	3.67875	81930	kinesin_family_member_18A	KIF18A	chr11	NM_031217	protein_coding	P5649
	111	KIF20A	0.679	0.305	5.85235	5.29348	10112	kinesin_family_member_20A	KIF20A	chr5	NM_005733	protein_coding	P7337
	112	KIF23	0.753	0.352	4.56462	4.15445	9493	kinesin_family_member_23	KIF23	chr15	NM_138555	protein_coding	P13885
	113	KIF4A	1.14	0.491	5.10052	5.2898	24137	kinesin_family_member_4A	KIF4A	chrX	NM_012310	protein_coding	P14670
	114	KIFC1	0.445	0.307	6.81361	5.64455	3833	kinesin_family_member_C1	KIFC1	chr6	NM_002263	protein_coding	P18484
	115	KLF11	3.54	1.111	2.79743	4.62123	8462	Kruppel-like_factor_11	KLF11	chr2	NM_003597	protein_coding	P27426
	116	KLHDC8B	0.534	0.483	1.90574	1	200942	kelch_domain_containing_8B	KLHDC8B	chr3	NM_173546	protein_coding	P15071
	117	KLHL22	0.226	0.425	4.21932	2.07108	84861	kelch-like_family_member_22	KLHL22	chr22	NM_032775	protein_coding	P2507
	118	LEMD2	0.604	0.456	6.81655	6.09028	221496	LEM_domain_containing_2	LEMD2	chr6	NM_181336	protein_coding	P7067
	119	LIN52	0.49	0.454	5.79994	4.77152	91750	lin-52_homolog__C._elegans	LIN52	chr14	NM_001024674	protein_coding	P3416
	120	LMLN	0.608	0.361	3.78869	3.07108	89782	leishmanolysin-like__metallopeptidase_M8_family	LMLN	chr3	NM_001136049	protein_coding
	121	LZTS2	0.569	0.469	5.93024	5.11753	84445	leucine_zipper__putative_tumor_suppressor_2	LZTS2	chr10	NM_032429	protein_coding	P16021
	122	MAD1L1	0.735	0.467	5.5409	5.0966	8379	MAD1_mitotic_arrest_deficient-like_1__yeast	MAD1L1	chr7	NM_001013837	protein_coding	P25578
	123	MASTL	0.521	0.385	5.76394	4.82339	84930	microtubule_associated_serine_threonine_kinase-like	MASTL	chr10	NM_001172303	protein_coding	P9170
	124	MCM10	0.271	0.445	6.24089	4.35819	55388	minichromosome_maintenance_complex_component_10	MCM10	chr10	NM_182751	protein_coding	P34474
	125	MCM2	0.308	0.395	6.02711	4.32977	4171	minichromosome_maintenance_complex_component_2	MCM2	chr3	NM_004526	protein_coding	P8859
	126	MCM4	0.414	0.366	9.59314	8.31992	4173	minichromosome_maintenance_complex_component_4	MCM4	chr8	NM_005914	protein_coding	P5809
	127	MCM5	0.343	0.371	7.25205	5.70943	4174	minichromosome_maintenance_complex_component_5	MCM5	chr22	NM_006739	protein_coding	P2450
	128	MCM6	0.403	0.368	8.22981	6.91717	4175	minichromosome_maintenance_complex_component_6	MCM6	chr2	NM_005915	protein_coding	P5485
	129	MCM7	0.39	0.432	8.15125	6.7938	4176	minichromosome_maintenance_complex_component_7	MCM7	chr7	NM_005916	protein_coding	P1237
	130	MDC1	0.883	0.479	6.11072	5.93142	9656	mediator_of_DNA-damage_checkpoint_1	MDC1	chr6	NM_014641	protein_coding	P10433
	131	MELK	0.903	0.494	5.50134	5.3547	9833	maternal_embryonic_leucine_zipper_kinase	MELK	chr9	NM_014791	protein_coding
	132	MEN1	0.703	0.385	4.9159	4.40667	4221	multiple_endocrine_neoplasia_I	MEN1	chr11	NM_000244	protein_coding	P22051
	133	MICAL3	0.618	0.42	4.33842	3.64455	57553	microtubule_associated_monooxygenase__calponin_and_LIM_domain_containing_3	MICAL3	chr22	NM_015241	protein_coding	P29577
	134	MIS18BP1	0.612	0.404	5.82637	5.11753	55320	MIS18_binding_protein_1	MIS18BP1	chr14	NM_018353	protein_coding	P2819
	135	MKI67	0.46	0.279	6.42127	5.30082	4288	marker_of_proliferation_Ki-67	MKI67	chr10	NM_002417	protein_coding	P16899
	136	MLH3	0.407	0.475	5.86938	4.57356	27030	mutL_homolog_3	MLH3	chr14	NM_001040108	protein_coding	P21344
	137	MRE11A	0.425	0.481	5.19818	3.96412	4361	MRE11_meiotic_recombination_11_homolog_A__S._cerevisiae	MRE11A	chr11	NM_005591		P31590
	138	MSH5	0.47	0.632	4.94837	3.85868	4439	mutS_homolog_5	MSH5	chr6	NM_172165	protein_coding	P21368
	139	MSH6	0.267	0.409	6.16005	4.25618	2956	mutS_homolog_6	MSH6	chr2	NM_000179	protein_coding	P25500
	140	MYBL2	0.585	0.473	7.80128	7.0286	4605	v-myb_avian_myeloblastosis_viral_oncogene_homolog-like_2	MYBL2	chr20	NM_002466	protein_coding	P12695
	141	MYC	5.118	1.97	7.01472	9.3703	4609	v-myc_avian_myelocytomatosis_viral_oncogene_homolog	MYC	chr8	NM_002467	protein_coding	P27610
	142	MYH10	0.369	0.311	7.03249	5.59464	4628	myosin__heavy_chain_10__non-muscle	MYH10	chr17	NM_005964	protein_coding	P1566
	143	NASP	0.47	0.347	8.14543	7.05598	4678	nuclear_autoantigenic_sperm_protein__histone-binding	NASP	chr1	NM_002482	protein_coding	P13813
	144	NCAPD2	0.666	0.391	8.57718	7.99109	9918	non-SMC_condensin_I_complex__subunit_D2	NCAPD2	chr12	NM_014865	protein_coding	P26847
	145	NCAPD3	0.441	0.378	7.96818	6.78729	23310	non-SMC_condensin_II_complex__subunit_D3	NCAPD3	chr11	NM_015261	protein_coding	P4897
	146	NCAPG	0.673	0.377	4.99055	4.42021	64151	non-SMC_condensin_I_complex__subunit_G	NCAPG	chr4	NM_022346	protein_coding	P5516
	147	NCAPH	0.686	0.271	6.12972	5.58565	23397	non-SMC_condensin_I_complex__subunit_H	NCAPH	chr2	NM_015341	protein_coding	P21377
	148	NDC80	0.677	0.448	3.52745	2.96403	10403	NDC80_kinetochore_complex_component	NDC80	chr18	NM_006101	protein_coding	P36145
	149	NEDD9	2.731	1.626	3.3115	4.76091	4739	neural_precursor_cell_expressed__developmentally_down-regulated_9	NEDD9	chr6	NM_006403	protein_coding	P32733
	150	NOTCH2	0.898	0.493	7.4454	7.29072	4853	notch_2	NOTCH2	chr1	NM_024408	protein_coding	P28510
	151	NUMA1	0.964	0.464	7.64917	7.59689	4926	nuclear_mitotic_apparatus_protein_1	NUMA1	chr11	NM_006185	protein_coding
	152	NUP210	0.424	0.372	7.47541	6.23909	23225	nucleoporin_210kDa	NUP210	chr3	NM_024923	protein_coding	P12604
	153	NUP85	0.474	0.437	5.69229	4.61536	79902	nucleoporin_85kDa	NUP85	chr17	NM_024844	protein_coding	P17046
	154	NUSAP1	0.777	0.386	7.47541	7.11131	51203	nucleolar_and_spindle_associated_protein_1	NUSAP1	chr15	NM_018454	protein_coding	P7834
	155	ORAOV1	0.484	0.7	8.50764	7.45931	220064	oral_cancer_overexpressed_1	ORAOV1	chr11	NM_153451	protein_coding	P25524
	156	ORC6	0.431	0.41	7.40213	6.18854	23594	origin_recognition_complex__subunit_6	ORC6	chr16	NM_014321	protein_coding	P32427
	157	PAPD7	0.629	0.372	4.85444	4.1865	11044	PAP_associated_domain_containing_7	PAPD7	chr5	NM_006999	protein_coding	P16912
	158	PBK	0.876	0.472	3.67694	3.48607	55872	PDZ_binding_kinase	PBK	chr8	NM_018492	protein_coding	P24725
	159	PCNT	0.63	0.389	6.65552	5.98937	5116	pericentrin	PCNT	chr21	NM_006031	protein_coding	P22749
	160	PHF23	0.508	0.412	6.18977	5.21405	79142	PHD_finger_protein_23	PHF23	chr17	NM_024297	protein_coding	P7215
	161	PHLDA1	110.727	4.715	3.89239	10.6833	22822	pleckstrin_homology-like_domain__family_A__member_1	PHLDA1	chr12	NM_007350	protein_coding	P34001
	162	PIM2	0.375	0.516	5.1053	3.68997	11040	pim-2_oncogene	PIM2	chrX	NM_006875	protein_coding	P3715
	163	PIM3	2.059	2.818	7.90344	8.94556	415116	pim-3_oncogene	PIM3	chr22	NM_001001852	protein_coding	P4694
	164	PKD2	0.481	0.599	5.19369	4.13816	5311	polycystic_kidney_disease_2__autosomal_dominant	PKD2	chr4	NM_000297	protein_coding	P26296
	165	PLK1	0.825	0.465	7.28524	7.00856	5347	polo-like_kinase_1	PLK1	chr16	NM_005030	protein_coding	P20823
	166	PLK2	3.629	0.623	4.40224	6.26185	10769	polo-like_kinase_2	PLK2	chr5	NM_006622	protein_coding	P30165
	167	PLK3	6.671	2.362	3.11587	5.8537	1263	polo-like_kinase_3	PLK3	chr1	NM_004073	protein_coding	P29365
	168	PLK4	0.636	0.433	5.31481	4.66175	10733	polo-like_kinase_4	PLK4	chr4	NM_014264	protein_coding	P3578
	169	POC1A	0.892	0.394	4.5435	4.37921	25886	POC1_centriolar_protein_A	POC1A	chr3	NM_015426	protein_coding	P32651
	170	POLE	0.343	0.435	6.72897	5.18654	5426	polymerase__DNA_directed__epsilon__catalytic_subunit	POLE	chr12	NM_006231	protein_coding	P35377
	171	POM121C	0.699	0.437	7.03249	6.51639	100101267	POM121_transmembrane_nucleoporin_C	POM121C	chr7	NM_001099415	protein_coding	P28251
	172	PPP1R15A	15.435	12.356	3.52745	7.47562	23645	protein_phosphatase_1__regulatory_subunit_15A	PPP1R15A	chr19	NM_014330	protein_coding	P12566
	173	PPP5C	0.429	0.726	7.00704	5.78728	5536	protein_phosphatase_5__catalytic_subunit	PPP5C	chr19	NM_006247	protein_coding	P26996
	174	PRC1	0.962	0.366	7.35146	7.29532	9055	protein_regulator_of_cytokinesis_1	PRC1	chr15	NM_003981	protein_coding	P24834
	175	PRIM1	0.372	0.462	4.93763	3.51159	5557	primase__DNA__polypeptide_1__49kDa	PRIM1	chr12	NM_000946	protein_coding	P3900
	176	PRKAB2	2.705	1.179	3.56973	5.00518	5565	protein_kinase__AMP-activated__beta_2_non-catalytic_subunit	PRKAB2	chr1	NM_005399	protein_coding
	177	PSMB10	0.404	0.754	6.51091	5.2023	5699	proteasome__prosome__macropain__subunit__beta_type__10	PSMB10	chr16	NM_002801	protein_coding	P2084
	178	PSMB2	0.473	0.841	9.31661	8.23671	5690	proteasome__prosome__macropain__subunit__beta_type__2	PSMB2	chr1	NM_002794	protein_coding	P6911
	179	PSMB8	0.511	0.493	5.44182	4.47314	5696	proteasome__prosome__macropain__subunit__beta_type__8	PSMB8	chr6	NM_148919	protein_coding	P14121
	180	PSMC3IP	0.253	0.623	4.02006	2.03633	29893	PSMC3_interacting_protein	PSMC3IP	chr17	NM_016556	protein_coding	P16100
	181	PSRC1	0.814	0.315	3.68975	3.393	84722	proline_serine-rich_coiled-coil_1	PSRC1	chr1	NM_032636	protein_coding	P15452
	182	PTP4A1	3.801	2.257	5.87784	7.80418	7803	protein_tyrosine_phosphatase_type_IVA__member_1	PTP4A1	chr6	NM_003463	protein_coding	P6267
	183	PTTG1	0.715	0.436	5.25119	4.76622	9232	pituitary_tumor-transforming_1	PTTG1	chr5	NM_004219	protein_coding	P17295
	184	RAB11FIP3	0.712	0.392	4.87711	4.38612	9727	RAB11_family_interacting_protein_3__class_II	RAB11FIP3	chr16	NM_014700	protein_coding	P24208
	185	RAB11FIP4	0.421	0.332	3.88127	2.63297	84440	RAB11_family_interacting_protein_4__class_II	RAB11FIP4	chr17	NM_032932	protein_coding	P31747
	186	RAB8A	0.635	0.473	7.7508	7.09451	4218	RAB8A__member_RAS_oncogene_family	RAB8A	chr19	NM_005370	protein_coding	P35487
	187	RACGAP1	1.151	0.412	5.91936	6.1217	29127	Rac_GTPase_activating_protein_1	RACGAP1	chr12	NM_001126104	protein_coding	P21813
	188	RAD51	0.386	0.395	5.72389	4.35113	5888	RAD51_recombinase	RAD51	chr15	NM_002875	protein_coding	P14674
	189	RAD51C	0.639	0.4	4.9322	4.28607	5889	RAD51_paralog_C	RAD51C	chr17	NM_058216	protein_coding
	190	RAD9A	0.475	0.632	5.22052	4.14633	5883	RAD9_homolog_A__S._pombe	RAD9A	chr11	NM_004584	protein_coding	P14736
	191	RASSF4	0.611	0.462	0.848798	0.137504	83937	Ras_association__RalGDS_AF-6__domain_family_member_4	RASSF4	chr10	NM_032023	protein_coding	P16852
	192	RBL1	0.312	0.453	4.42553	2.74481	5933	retinoblastoma-like_1__p107	RBL1	chr20	NM_002895	protein_coding	P29227
	193	RCC1	0.534	0.487	7.24444	6.34054	1104	regulator_of_chromosome_condensation_1	RCC1	chr1	NM_001048194	protein_coding	P17131
	194	REC8	0.286	0.742	4.94298	3.13816	9985	REC8_meiotic_recombination_protein	REC8	chr14	NM_001048205	protein_coding	P16201
	195	RFC3	0.388	0.58	5.8946	4.53051	5983	replication_factor_C__activator_1__3__38kDa	RFC3	chr13	NM_002915	protein_coding	P25977
	196	RFC4	0.339	0.476	5.88904	4.32977	5984	replication_factor_C__activator_1__4__37kDa	RFC4	chr3	NM_002916	protein_coding	P18930
	197	RGS2	5.37	0.467	2.14861	4.57356	5997	regulator_of_G-protein_signaling_2__24kDa	RGS2	chr1	NM_002923	protein_coding	P32571
	198	RIF1	0.222	0.417	5.32308	3.15445	55183	RAP1_interacting_factor_homolog__yeast	RIF1	chr2	NM_018151	protein_coding	P22970
	199	ROCK2	0.939	0.423	6.15078	6.06031	9475	Rho-associated__coiled-coil_containing_protein_kinase_2	ROCK2	chr2	NM_004850	protein_coding	P24441
	200	RPA1	0.435	0.433	7.51567	6.31539	6117	replication_protein_A1__70kDa	RPA1	chr17	NM_002945	protein_coding	P17024
	201	RRAGC	2.148	0.972	4.66568	5.76887	64121	Ras-related_GTP_binding_C	RRAGC	chr1	NM_022157	protein_coding	P4932
	202	RRM1	0.535	0.499	6.19204	5.2898	6240	ribonucleotide_reductase_M1	RRM1	chr11	NM_001033	protein_coding	P24542
	203	RRM2	0.337	0.356	7.70721	6.1382	6241	ribonucleotide_reductase_M2	RRM2	chr2	NM_001034	protein_coding	P9075
	204	RRS1	0.465	0.56	6.18751	5.08389	23212	RRS1_ribosome_biogenesis_regulator_homolog__S._cerevisiae	RRS1	chr8	NM_015169	protein_coding	P1015
	205	SFI1	0.482	0.403	4.25437	3.20226	9814	Sfi1_homolog__spindle_assembly_associated__yeast	SFI1	chr22	NM_001007467	protein_coding	P15865
	206	SGOL1	0.597	0.431	4.35466	3.6094		shugoshin-like_1__S._pombe	SGOL1	chr3	NM_001012410		P10883
	207	SGSM3	0.491	0.827	5.72699	4.70111	27352	small_G_protein_signaling_modulator_3	SGSM3	chr22	NM_015705	protein_coding	P32364
	208	SIAH2	2.429	0.83	4.81394	6.09451	6478	siah_E3_ubiquitin_protein_ligase_2	SIAH2	chr3	NM_005067	protein_coding	P26619
	209	SIK1	4.025	1.674	5.1053	7.11444	150094	salt-inducible_kinase_1	SIK1	chr21	NM_173354	protein_coding	P19030
	210	SKA3	0.464	0.425	4.08958	2.9824	221150	spindle_and_kinetochore_associated_complex_subunit_3	SKA3	chr13	NM_145061	protein_coding	P27750
	211	SKP2	0.193	0.275	7.0096	4.63877	6502	S-phase_kinase-associated_protein_2__E3_ubiquitin_protein_ligase	SKP2	chr5	NM_005983	protein_coding	P24723
	212	SLBP	0.482	0.49	7.17871	6.12584	7884	stem-loop_binding_protein	SLBP	chr4	NM_006527	protein_coding	P9739
	213	SMC1A	0.525	0.422	7.34741	6.41854	8243	structural_maintenance_of_chromosomes_1A	SMC1A	chrX	NM_006306	protein_coding	P21119
	214	SMC2	0.507	0.402	5.17552	4.1944	10592	structural_maintenance_of_chromosomes_2	SMC2	chr9	NM_006444	protein_coding	P35344
	215	SMC4	0.675	0.498	6.85842	6.29164	10051	structural_maintenance_of_chromosomes_4	SMC4	chr3	NM_001002800	protein_coding	P24048
	216	SMC5	0.355	0.529	4.28014	2.78722	23137	structural_maintenance_of_chromosomes_5	SMC5	chr9	NM_015110	protein_coding	P18210
	217	SNX18	4.081	0.875	3.3115	5.34053	112574	sorting_nexin_18	SNX18	chr5	NM_001102575	protein_coding	P2082
	218	SNX9	2.084	1.088	4.56462	5.62419	51429	sorting_nexin_9	SNX9	chr6	NM_016224	protein_coding	P25887
	219	SPAG5	0.682	0.325	6.63573	6.08389	10615	sperm_associated_antigen_5	SPAG5	chr17	NM_006461	protein_coding	P23131
	220	SPC24	0.389	0.31	5.57939	4.21793	147841	SPC24__NDC80_kinetochore_complex_component	SPC24	chr19	NM_182513	protein_coding	P13722
	221	SPDL1	0.598	0.347	4.87145	4.12994	54908	spindle_apparatus_coiled-coil_protein_1	SPDL1	chr5	NM_017785	protein_coding	P22435
	222	SPICE1	0.632	0.387	5.74252	5.07963	152185	spindle_and_centriole_associated_protein_1	SPICE1	chr3	NM_144718	protein_coding	P28310
	223	SPIRE2	0.42	0.668	5.29811	4.04509	84501	spire-type_actin_nucleation_factor_2	SPIRE2	chr16	NM_032451	protein_coding	P3268
	224	SPRY2	7.697	1.319	2.50919	5.45355	10253	sprouty_homolog_2__Drosophila	SPRY2	chr13	NM_005842	protein_coding	P10600
	225	SRC	1.263	0.451	5.07622	5.41346	6714	v-src_avian_sarcoma__Schmidt-Ruppin_A-2__viral_oncogene_homolog	SRC	chr20	NM_198291	protein_coding	P18812
	226	STIL	0.752	0.443	7.19796	6.78598	6491	SCL_TAL1_interrupting_locus	STIL	chr1	NM_001048166	protein_coding	P30667
	227	STK10	2.184	0.898	4.59908	5.72588	6793	serine_threonine_kinase_10	STK10	chr5	NM_005990	protein_coding	P15624
	228	SUGT1	0.495	0.572	4.39445	3.37921	10910	SGT1__suppressor_of_G2_allele_of_SKP1__S._cerevisiae	SUGT1	chr13	NM_001130912	protein_coding	P29101
	229	SUV39H1	0.346	0.193	5.84087	4.30808	6839	suppressor_of_variegation_3-9_homolog_1__Drosophila	SUV39H1	chrX	NM_003173	protein_coding	P14945
	230	TACC3	0.598	0.34	6.04223	5.30082	10460	transforming__acidic_coiled-coil_containing_protein_3	TACC3	chr4	NM_006342	protein_coding	P1536
	231	TAOK2	0.475	0.316	6.80034	5.72588	9344	TAO_kinase_2	TAOK2	chr16	NM_016151	protein_coding	P30142
	232	TDRKH	1.25	0.458	3.90342	4.22566	11022	tudor_and_KH_domain_containing	TDRKH	chr1	NM_001083963	protein_coding	P26362
	233	TET2	1.013	0.39	4.12788	4.14633	54790	tet_methylcytosine_dioxygenase_2	TET2	chr4	NM_001127208	protein_coding	P29262
	234	TFDP1	0.497	0.652	8.68181	7.67454	7027	transcription_factor_Dp-1	TFDP1	chr13	NM_007111	protein_coding
	235	THBS1	2.429	0.498	6.53782	7.81832	7057	thrombospondin_1	THBS1	chr15	NM_003246	protein_coding	P726
	236	TICRR	0.24	0.355	6.44989	4.393	90381	TOPBP1-interacting_checkpoint_and_replication_regulator	TICRR	chr15	NM_152259	protein_coding	P9274
	237	TIPIN	0.413	0.652	5.85519	4.5796	54962	TIMELESS_interacting_protein	TIPIN	chr15	NM_017858	protein_coding	P34337
	238	TOP2A	1.007	0.368	7.07475	7.08497	7153	topoisomerase__DNA__II_alpha_170kDa	TOP2A	chr17	NM_001067	protein_coding	P25135
	239	TOP2B	0.455	0.387	5.30648	4.17057	7155	topoisomerase__DNA__II_beta_180kDa	TOP2B	chr3	NM_001068	protein_coding	P17665
	240	TRAPPC12	0.579	0.314	3.59729	2.80797	51112	trafficking_protein_particle_complex_12	TRAPPC12	chr2	NM_016030	protein_coding	P8165
	241	TRIP13	0.459	0.658	7.10266	5.97797	9319	thyroid_hormone_receptor_interactor_13	TRIP13	chr5	NM_004237	protein_coding	P23211
	242	TUBA4A	0.225	0.242	6.8398	4.68997	7277	tubulin__alpha_4a	TUBA4A	chr2	NM_006000	protein_coding	P23379
	243	TUBB	0.37	0.536	10.3429	8.90729	203068	tubulin__beta_class_I	TUBB	chr6	NM_178014	protein_coding	P4357
	244	TUBB4B	0.375	0.304	7.15342	5.73674	10383	tubulin__beta_4B_class_IVb	TUBB4B	chr9	NM_006088	protein_coding	P24700
	245	TUBGCP5	0.348	0.581	6.39208	4.86859	114791	tubulin__gamma_complex_associated_protein_5	TUBGCP5	chr15	NM_052903	protein_coding	P21912
	246	TUSC2	0.446	1.005	5.36776	4.20226	11334	tumor_suppressor_candidate_2	TUSC2	chr3	NM_007275	protein_coding	P7156
	247	TXNIP	0.183	1.081	4.85444	2.40654	10628	thioredoxin_interacting_protein	TXNIP	chr1	NM_006472	protein_coding	P19948
	248	UBE2C	1.214	0.442	8.20372	8.4829	11065	ubiquitin-conjugating_enzyme_E2C	UBE2C	chr20	NM_007019	protein_coding	P17282
	249	UHRF2	2.038	1.615	6.81361	7.84053	115426	ubiquitin-like_with_PHD_and_ring_finger_domains_2__E3_ubiquitin_protein_ligase	UHRF2	chr9	NM_152896	protein_coding	P31862
	250	WDR62	0.395	0.391	5.23814	3.89792	284403	WD_repeat_domain_62	WDR62	chr19	NM_001083961	protein_coding	P8176
	251	XPO1	0.497	0.643	5.46816	4.46009	7514	exportin_1__CRM1_homolog__yeast	XPO1	chr2	NM_003400	protein_coding	P5474
	252	XRCC3	0.354	0.401	6.18068	4.68437	7517	X-ray_repair_complementing_defective_repair_in_Chinese_hamster_cells_3	XRCC3	chr14	NM_001100118	protein_coding	P30635
	253	ZFYVE26	0.598	0.432	6.58675	5.84617	23503	zinc_finger__FYVE_domain_containing_26	ZFYVE26	chr14	NM_015346	protein_coding	P4641
	254	ZNF318	0.641	0.263	4.47093	3.82843	24149	zinc_finger_protein_318	ZNF318	chr6	NM_014345	protein_coding	P29907
	255	ZNF830	0.812	0.423	4.36268	4.06247	91603	zinc_finger_protein_830	ZNF830	chr17	NM_052857	protein_coding	P8009
	256	ZWINT	0.544	0.28	7.89791	7.01862	11130	ZW10_interacting_kinetochore_protein	ZWINT	chr10	NM_032997	protein_coding	P25561

## Sheet: Cell proliferation
			Fold change		Log2(normalized RC)
		Gene symbol	FaDu	SCC15	FaDu	SCC15	Entrez ID	Description	Gene ID	Chromosome	Transcript ID	Biotype	Protein ID
	1	AREG	10.515	11.746	5.29392	8.68825	374	amphiregulin	AREG	chr4	NM_001657	protein_coding	P21318
	2	ARHGEF2	3.927	2.644	3.67694	5.65031	9181	Rho_Rac_guanine_nucleotide_exchange_factor__GEF__2	ARHGEF2	chr1	NM_001162383	protein_coding	P10550
	3	ARID2	0.674	0.485	5.24249	4.6731	196528	AT_rich_interactive_domain_2__ARID__RFX-like	ARID2	chr12	NM_152641	protein_coding	P27620
	4	ASPM	0.316	0.344	5.53023	3.86859	259266	asp__abnormal_spindle__homolog__microcephaly_associated__Drosophila	ASPM	chr1	NM_018136	protein_coding	P13174
	5	BCAT1	2.547	0.941	5.6665	7.01527	586	branched_chain_amino-acid_transaminase_1__cytosolic	BCAT1	chr12	NM_001178093	protein_coding	P25099
	6	BCL2L1	2.133	1.614	6.89772	7.99052	598	BCL2-like_1	BCL2L1	chr20	NM_138578	protein_coding	P34913
	7	BMP4	0.636	0.153	0.652601	0	652	bone_morphogenetic_protein_4	BMP4	chr14	NM_130851	protein_coding	P10358
	8	BMPR2	0.686	0.442	4.47093	3.92666	659	bone_morphogenetic_protein_receptor__type_II__serine_threonine_kinase	BMPR2	chr2	NM_001204	protein_coding	P1973
	9	BST2	0.48	0.533	7.52377	6.46503	684	bone_marrow_stromal_cell_antigen_2	BST2	chr19	NM_004335	protein_coding	P20377
	10	BUB1B	0.813	0.405	5.9912	5.69279	701	BUB1_mitotic_checkpoint_serine_threonine_kinase_B	BUB1B	chr15	NM_001211	protein_coding	P34259
	11	CCND1	0.383	0.828	10.0317	8.64528	595	cyclin_D1	CCND1	chr11	NM_053056	protein_coding	P23745
	12	CCND3	0.466	0.693	5.65016	4.54911	896	cyclin_D3	CCND3	chr6	NM_001760	protein_coding	P2045
	13	CD40	0.653	0.464	1.10098	0.485427	958	CD40_molecule__TNF_receptor_superfamily_member_5	CD40	chr20	NM_001250	protein_coding	P27401
	14	CDC14A	1.377	0.355	3.03756	3.49889	8556	cell_division_cycle_14A	CDC14A	chr1	NM_033312	protein_coding	P35731
	15	CDK1	0.852	0.382	6.2604	6.0297	983	cyclin-dependent_kinase_1	CDK1	chr10	NM_001786	protein_coding	P16373
	16	CDK5	0.611	0.451	5.49771	4.78728	1020	cyclin-dependent_kinase_5	CDK5	chr7	NM_004935	protein_coding	P12612
	17	CTGF	29.192	0.835	2.64731	7.51482	1490	connective_tissue_growth_factor	CTGF	chr6	NM_001901	protein_coding	P8436
	18	CXCL1	2.708	27.75	4.52926	5.96648	2919	chemokine__C-X-C_motif__ligand_1__melanoma_growth_stimulating_activity__alpha	CXCL1	chr4	NM_001511	protein_coding	P9022
	19	CYP1A1	3.961	3.407	2.99675	4.98254	1543	cytochrome_P450__family_1__subfamily_A__polypeptide_1	CYP1A1	chr15	NM_000499	protein_coding	P3223
	20	CYR61	5.086	1.086	7.0575	9.40414	3491	cysteine-rich__angiogenic_inducer__61	CYR61	chr1	NM_001554	protein_coding	P15487
	21	DDIT4	23.649	9.964	6.75059	11.3143	54541	DNA-damage-inducible_transcript_4	DDIT4	chr10	NM_019058	protein_coding	P9375
	22	DLGAP5	0.763	0.367	7.24771	6.85743	9787	discs__large__Drosophila__homolog-associated_protein_5	DLGAP5	chr14	NM_014750	protein_coding	P28518
	23	EDNRA	1.872	3.346	1.02148	1.92638	1909	endothelin_receptor_type_A	EDNRA	chr4	NM_001957	protein_coding	P935
	24	EGR1	8.827	1.018	6.20551	9.34744	1958	early_growth_response_1	EGR1	chr5	NM_001964	protein_coding	P19923
	25	EHF	2.536	1.201	5.09085	6.43366	26298	ets_homologous_factor	EHF	chr11	NM_001206616	protein_coding	P27946
	26	EPHA2	3.395	2.443	7.46983	9.23336	1969	EPH_receptor_A2	EPHA2	chr1	NM_004431	protein_coding	P21297
	27	EREG	2.699	3.07	5.73942	7.17163	2069	epiregulin	EREG	chr4	NM_001432	protein_coding	P22210
	28	ERN1	3.966	2.647	3.46897	5.45684	2081	endoplasmic_reticulum_to_nucleus_signaling_1	ERN1	chr17	NM_001433	protein_coding	P8588
	29	FAM83B	3.479	1.284	4.08958	5.88821	222584	family_with_sequence_similarity_83__member_B	FAM83B	chr6	NM_001010872	protein_coding	P21857
	30	FAM83D	0.789	0.459	5.93024	5.58865	81610	family_with_sequence_similarity_83__member_D	FAM83D	chr20	NM_030919	protein_coding	P33640
	31	FGF1	0.309	0.155	2.07211	0.378512	2246	fibroblast_growth_factor_1__acidic	FGF1	chr5	NM_000800	protein_coding	P24106
	32	FGFR2	0.469	0.279	4.6526	3.56133	2263	fibroblast_growth_factor_receptor_2	FGFR2	chr10	NM_022970	protein_coding	P21827
	33	FGFR3	0.252	0.468	4.12788	2.13816	2261	fibroblast_growth_factor_receptor_3	FGFR3	chr4	NM_001163213	protein_coding	P18332
	34	FIGNL1	0.589	0.487	5.85519	5.09238	63979	fidgetin-like_1	FIGNL1	chr7	NM_001042762	protein_coding	P1380
	35	GINS1	0.266	0.402	4.98012	3.07108	9837	GINS_complex_subunit_1__Psf1_homolog	GINS1	chr20	NM_021067	protein_coding	P2100
	36	GLI3	0.551	0.382	5.24686	4.38612	2737	GLI_family_zinc_finger_3	GLI3	chr7	NM_000168	protein_coding	P23077
	37	GPC4	0.474	0.469	2.50919	1.43349	2239	glypican_4	GPC4	chrX	NM_001448	protein_coding	P15206
	38	GRHL2	0.687	0.386	6.80921	6.26748	79977	grainyhead-like_2__Drosophila	GRHL2	chr8	NM_024915	protein_coding	P32475
	39	HMGA2	2.973	1.37	3.03756	4.60946	8091	high_mobility_group_AT-hook_2	HMGA2	chr12	NM_003483	protein_coding	P5264
	40	IL1A	13.83	5.76	3.67694	7.46667	3552	interleukin_1__alpha	IL1A	chr2	NM_000575	protein_coding	P2572
	41	IL7R	2.171	0.683	4.89385	6.01192	3575	interleukin_7_receptor	IL7R	chr5	NM_002185	protein_coding	P34961
	42	IRF2	0.471	0.525	5.23373	4.14633	3660	interferon_regulatory_factor_2	IRF2	chr4	NM_002199	protein_coding	P15632
	43	IRS2	2.428	1.935	3.63761	4.91715	8660	insulin_receptor_substrate_2	IRS2	chr13	NM_003749	protein_coding	P23139
	44	ISG20	3.697	1.388	3.58352	5.46992	3669	interferon_stimulated_exonuclease_gene_20kDa	ISG20	chr15	NM_002201	protein_coding
	45	ITGA2	3.099	1.456	5.63363	7.26561	3673	integrin__alpha_2__CD49B__alpha_2_subunit_of_VLA-2_receptor	ITGA2	chr5	NM_002203	protein_coding	P24297
	46	JUNB	1.955	3.889	6.90464	7.87168	3726	jun_B_proto-oncogene	JUNB	chr19	NM_002229	protein_coding	P3250
	47	KAT2A	0.22	0.792	6.04223	3.85868	2648	K_lysine__acetyltransferase_2A	KAT2A	chr17	NM_021078	protein_coding	P7531
	48	LAMA5	0.456	0.282	6.93869	5.80547	3911	laminin__alpha_5	LAMA5	chr20	NM_005560	protein_coding	P27396
	49	LGR4	0.186	0.366	3.19014	0.765535	55366	leucine-rich_repeat_containing_G_protein-coupled_receptor_4	LGR4	chr11	NM_018490	protein_coding	P10264
	50	LIPA	0.43	0.582	6.31119	5.09238	3988	lipase_A__lysosomal_acid__cholesterol_esterase	LIPA	chr10	NM_001127605	protein_coding	P5405
	51	MCM10	0.271	0.445	6.24089	4.35819	55388	minichromosome_maintenance_complex_component_10	MCM10	chr10	NM_182751	protein_coding	P34474
	52	MCM7	0.39	0.432	8.15125	6.7938	4176	minichromosome_maintenance_complex_component_7	MCM7	chr7	NM_005916	protein_coding	P1237
	53	MELK	0.903	0.494	5.50134	5.3547	9833	maternal_embryonic_leucine_zipper_kinase	MELK	chr9	NM_014791	protein_coding
	54	MET	2.352	1.092	5.84662	7.08071	4233	met_proto-oncogene	MET	chr7	NM_000245	protein_coding	P3251
	55	MKI67	0.46	0.279	6.42127	5.30082	4288	marker_of_proliferation_Ki-67	MKI67	chr10	NM_002417	protein_coding	P16899
	56	MRE11A	0.425	0.481	5.19818	3.96412	4361	MRE11_meiotic_recombination_11_homolog_A__S._cerevisiae	MRE11A	chr11	NM_005591		P31590
	57	MXD1	6.217	3.061	4.60585	7.24196	4084	MAX_dimerization_protein_1	MXD1	chr2	NM_002357	protein_coding	P24470
	58	MYC	5.118	1.97	7.01472	9.3703	4609	v-myc_avian_myelocytomatosis_viral_oncogene_homolog	MYC	chr8	NM_002467	protein_coding	P27610
	59	NASP	0.47	0.347	8.14543	7.05598	4678	nuclear_autoantigenic_sperm_protein__histone-binding	NASP	chr1	NM_002482	protein_coding	P13813
	60	NRG1	3.338	5.389	3.97874	5.71768	3084	neuregulin_1	NRG1	chr8	NM_013956	protein_coding	P3717
	61	NUMBL	0.428	0.55	5.07133	3.8487	9253	numb_homolog__Drosophila_-like	NUMBL	chr19	NM_004756	protein_coding	P15384
	62	OTUD6B	0.449	0.763	4.89942	3.74481	51633	OTU_domain_containing_6B	OTUD6B	chr8	NM_016023	protein_coding	P24556
	63	PIM2	0.375	0.516	5.1053	3.68997	11040	pim-2_oncogene	PIM2	chrX	NM_006875	protein_coding	P3715
	64	PLCE1	1.063	0.247	1.17568	1.26364	51196	phospholipase_C__epsilon_1	PLCE1	chr10	NM_016341	protein_coding	P4913
	65	PLK1	0.825	0.465	7.28524	7.00856	5347	polo-like_kinase_1	PLK1	chr16	NM_005030	protein_coding	P20823
	66	PTK2B	4.417	0.94	4.82563	6.96878	2185	protein_tyrosine_kinase_2_beta	PTK2B	chr8	NM_173176	protein_coding	P26538
	67	PURB	0.467	0.843	4.76617	3.66744	5814	purine-rich_element_binding_protein_B	PURB	chr7	NM_033224	protein_coding	P19655
	68	RACGAP1	1.151	0.412	5.91936	6.1217	29127	Rac_GTPase_activating_protein_1	RACGAP1	chr12	NM_001126104	protein_coding	P21813
	69	RHBDF1	0.458	0.664	5.9912	4.86364	64285	rhomboid_5_homolog_1__Drosophila	RHBDF1	chr16	NM_022450	protein_coding	P6373
	70	RRM1	0.535	0.499	6.19204	5.2898	6240	ribonucleotide_reductase_M1	RRM1	chr11	NM_001033	protein_coding	P24542
	71	SEMA5A	1	0.494	0	0	9037	sema_domain__seven_thrombospondin_repeats__type_1_and_type_1-like__transmembrane_domain__TM__and_short_cytoplasmic_domain__semaphorin__5A	SEMA5A	chr5	NM_003966	protein_coding	P32153
	72	SIPA1	0.582	0.376	5.80882	5.02746	6494	signal-induced_proliferation-associated_1	SIPA1	chr11	NM_006747	protein_coding	P16473
	73	SIX1	0.421	0.878	4.40224	3.15445	6495	SIX_homeobox_1	SIX1	chr14	NM_005982	protein_coding	P23752
	74	SOX9	3.753	1.575	3.3444	5.2524	6662	SRY__sex_determining_region_Y_-box_9	SOX9	chr17	NM_000346	protein_coding	P11849
	75	SRC	1.263	0.451	5.07622	5.41346	6714	v-src_avian_sarcoma__Schmidt-Ruppin_A-2__viral_oncogene_homolog	SRC	chr20	NM_198291	protein_coding	P18812
	76	STC1	8.061	1.098	1.71765	4.72857	6781	stanniocalcin_1	STC1	chr8	NM_003155	protein_coding	P15890
	77	STIL	0.752	0.443	7.19796	6.78598	6491	SCL_TAL1_interrupting_locus	STIL	chr1	NM_001048166	protein_coding	P30667
	78	TACC2	0.543	0.428	5.06639	4.1865	10579	transforming__acidic_coiled-coil_containing_protein_2	TACC2	chr10	NM_206862	protein_coding	P34302
	79	TACC3	0.598	0.34	6.04223	5.30082	10460	transforming__acidic_coiled-coil_containing_protein_3	TACC3	chr4	NM_006342	protein_coding	P1536
	80	TCF19	0.219	0.337	5.49771	3.30801	6941	transcription_factor_19	TCF19	chr6	NM_001077511	protein_coding	P23128
	81	TFDP1	0.497	0.652	8.68181	7.67454	7027	transcription_factor_Dp-1	TFDP1	chr13	NM_007111	protein_coding
	82	TGFA	2.88	1.663	5.09085	6.61687	7039	transforming_growth_factor__alpha	TGFA	chr2	NM_003236	protein_coding	P33380
	83	TUSC2	0.446	1.005	5.36776	4.20226	11334	tumor_suppressor_candidate_2	TUSC2	chr3	NM_007275	protein_coding	P7156
	84	TWIST1	4.879	0.47	1.76723	4.05381	7291	twist_family_bHLH_transcription_factor_1	TWIST1	chr7	NM_000474	protein_coding	P2779
	85	UHRF2	2.038	1.615	6.81361	7.84053	115426	ubiquitin-like_with_PHD_and_ring_finger_domains_2__E3_ubiquitin_protein_ligase	UHRF2	chr9	NM_152896	protein_coding	P31862
	86	USP13	0.47	0.337	6.13443	5.04509	8975	ubiquitin_specific_peptidase_13__isopeptidase_T-3	USP13	chr3	NM_003940	protein_coding	P7072
	87	USPL1	0.877	0.499	3.05762	2.86849	10208	ubiquitin_specific_peptidase_like_1	USPL1	chr13	NM_005800	protein_coding	P25869
	88	WNT3A	0.814	0.258	0.297485	0	89780	wingless-type_MMTV_integration_site_family__member_3A	WNT3A	chr1	NM_033131	protein_coding	P21726
	89	WNT7A	0.351	0.639	4.11836	2.60928	7476	wingless-type_MMTV_integration_site_family__member_7A	WNT7A	chr3	NM_004625	protein_coding	P18147
	90	WNT7B	2.795	0.584	4.59908	6.08177	7477	wingless-type_MMTV_integration_site_family__member_7B	WNT7B	chr22	NM_058238	protein_coding	P28257
	91	XBP1	4.425	1.285	6.62572	8.77153	7494	X-box_binding_protein_1	XBP1	chr22	NM_001079539	protein_coding	P24394
	92	ZFP36L1	4.802	1.722	6.04223	8.30585	677	ZFP36_ring_finger_protein-like_1	ZFP36L1	chr14	NM_004926	protein_coding	P35345
	93	ZNRF3	0.432	0.717	4.15591	2.94542	84133	zinc_and_ring_finger_3	ZNRF3	chr22	NM_001206998	protein_coding	P11197

## Sheet: Cell migration
			Fold change		Log2(normalized RC)
		Gene symbol	FaDu	SCC15	FaDu	SCC15	Entrez ID	Description	Gene ID	Chromosome	Transcript ID	Biotype	Protein ID
	1	ACVR1	2.231	0.888	5.00086	6.15854	90	activin_A_receptor__type_I	ACVR1	chr2	NM_001111067	protein_coding	P29591
	2	ADAM8	3.504	2.279	3.78869	5.59762	101	ADAM_metallopeptidase_domain_8	ADAM8	chr10	NM_001109	protein_coding	P23125
	3	ANLN	0.661	0.372	7.58009	6.98369	54443	anillin__actin_binding_protein	ANLN	chr7	NM_018685	protein_coding	P34291
	4	ANXA1	2.605	1.432	9.29311	10.6743	301	annexin_A1	ANXA1	chr9	NM_000700	protein_coding	P24461
	5	APBB2	4.545	0.955	4.69783	6.88212	323	amyloid_beta__A4__precursor_protein-binding__family_B__member_2	APBB2	chr4	NM_004307	protein_coding	P33074
	6	APC	0.517	0.393	5.75478	4.80287	324	adenomatous_polyposis_coli	APC	chr5	NM_000038	protein_coding	P18457
	7	ARHGAP35	0.819	0.461	6.46679	6.17862	2909	Rho_GTPase_activating_protein_35	ARHGAP35	chr19	NM_004491	protein_coding	P36075
	8	ARHGEF16	0.748	0.386	4.86012	4.44029	27237	Rho_guanine_nucleotide_exchange_factor__GEF__16	ARHGEF16	chr1	NM_014448	protein_coding	P24759
	9	ASPM	0.316	0.344	5.53023	3.86859	259266	asp__abnormal_spindle__homolog__microcephaly_associated__Drosophila	ASPM	chr1	NM_018136	protein_coding	P13174
	10	BIN3	0.868	0.424	4.79025	4.58562	55909	bridging_integrator_3	BIN3	chr8	NM_018688	protein_coding	P14395
	11	BTG1	3.406	2.355	6.16237	7.93025	694	B-cell_translocation_gene_1__anti-proliferative	BTG1	chr12	NM_001731	protein_coding	P18766
	12	CCL20	22.911	7.485	0	4.51797	6364	chemokine__C-C_motif__ligand_20	CCL20	chr2	NM_004591	protein_coding	P3684
	13	CD47	0.445	0.998	5.74865	4.5796	961	CD47_molecule	CD47	chr3	NM_001777	protein_coding	P28398
	14	CDK1	0.852	0.382	6.2604	6.0297	983	cyclin-dependent_kinase_1	CDK1	chr10	NM_001786	protein_coding	P16373
	15	CDK5	0.611	0.451	5.49771	4.78728	1020	cyclin-dependent_kinase_5	CDK5	chr7	NM_004935	protein_coding	P12612
	16	CELSR1	0.715	0.368	8.3394	7.85557	9620	cadherin__EGF_LAG_seven-pass_G-type_receptor_1	CELSR1	chr22	NM_014246	protein_coding	P10501
	17	COL5A1	0.695	0.433	2.1107	1.58544	1289	collagen__type_V__alpha_1	COL5A1	chr9	NM_000093	protein_coding	P16877
	18	CTGF	29.192	0.835	2.64731	7.51482	1490	connective_tissue_growth_factor	CTGF	chr6	NM_001901	protein_coding	P8436
	19	CXCL1	2.708	27.75	4.52926	5.96648	2919	chemokine__C-X-C_motif__ligand_1__melanoma_growth_stimulating_activity__alpha	CXCL1	chr4	NM_001511	protein_coding	P9022
	20	CXCL2	10.35	37.253	2.67356	6.04509	2920	chemokine__C-X-C_motif__ligand_2	CXCL2	chr4	NM_002089	protein_coding	P1471
	21	CXCL3	11.253	17.576	0.543991	4.03624	2921	chemokine__C-X-C_motif__ligand_3	CXCL3	chr4	NM_002090	protein_coding	P30282
	22	CYR61	5.086	1.086	7.0575	9.40414	3491	cysteine-rich__angiogenic_inducer__61	CYR61	chr1	NM_001554	protein_coding	P15487
	23	DAB2IP	0.5	0.478	6.78695	5.78728	153090	DAB2_interacting_protein	DAB2IP	chr9	NM_032552	protein_coding	P7062
	24	DDIT4	23.649	9.964	6.75059	11.3143	54541	DNA-damage-inducible_transcript_4	DDIT4	chr10	NM_019058	protein_coding	P9375
	25	EDN1	6.743	2.769	1.24732	4.00063	1906	endothelin_1	EDN1	chr6	NM_001955	protein_coding	P14032
	26	EFNA1	0.891	4.841	4.6526	4.48607	1942	ephrin-A1	EFNA1	chr1	NM_004428	protein_coding	P1353
	27	EFNB2	4.061	1.052	3.05762	5.07963	1948	ephrin-B2	EFNB2	chr13	NM_004093	protein_coding	P14201
	28	EGR3	2.366	0.893	3.11587	4.35819	1960	early_growth_response_3	EGR3	chr8	NM_004430	protein_coding	P32924
	29	ELMO2	0.8	0.361	4.49307	4.17057	63916	engulfment_and_cell_motility_2	ELMO2	chr20	NM_182764	protein_coding	P8474
	30	ELMO3	0.49	0.744	5.74252	4.71216	79767	engulfment_and_cell_motility_3	ELMO3	chr16	NM_024712	protein_coding	P33429
	31	ELP3	1.095	0.487	5.79103	5.92194	55140	elongator_acetyltransferase_complex_subunit_3	ELP3	chr8	NM_018091	protein_coding	P2928
	32	ENG	0.411	1	5.16177	3.87843	2022	endoglin	ENG	chr9	NM_001114753	protein_coding	P26315
	33	EPHA2	3.395	2.443	7.46983	9.23336	1969	EPH_receptor_A2	EPHA2	chr1	NM_004431	protein_coding	P21297
	34	EPHB4	0.45	0.499	6.51091	5.35822	2050	EPH_receptor_B4	EPHB4	chr7	NM_004444	protein_coding	P5676
	35	FAM83D	0.789	0.459	5.93024	5.58865	81610	family_with_sequence_similarity_83__member_D	FAM83D	chr20	NM_030919	protein_coding	P33640
	36	FRK	0.389	0.559	5.34355	3.98249	2444	fyn-related_kinase	FRK	chr6	NM_002031	protein_coding	P13398
	37	FUT10	0.374	0.444	4.66568	3.24853	84750	fucosyltransferase_10__alpha__1_3__fucosyltransferase	FUT10	chr8	NM_032664	protein_coding	P29070
	38	GCNT1	0.369	0.294	3.78869	2.35106	2650	glucosaminyl__N-acetyl__transferase_1__core_2	GCNT1	chr9	NM_001097633	protein_coding	P17110
	39	GLI3	0.551	0.382	5.24686	4.38612	2737	GLI_family_zinc_finger_3	GLI3	chr7	NM_000168	protein_coding	P23077
	40	GPC1	0.425	0.402	7.64092	6.40499	2817	glypican_1	GPC1	chr2	NM_002081	protein_coding	P33749
	41	HBEGF	33.023	22.445	4.34653	9.39194	1839	heparin-binding_EGF-like_growth_factor	HBEGF	chr5	NM_001945	protein_coding	P29501
	42	HOXB9	5.1	3.263	1.61353	3.96412	3219	homeobox_B9	HOXB9	chr17	NM_024017	protein_coding	P20419
	43	IL1B	3.029	2.866	5.4756	7.0743	3553	interleukin_1__beta	IL1B	chr2	NM_000576	protein_coding	P29920
	44	IL6R	3.288	2.751	4.10886	5.82596	3570	interleukin_6_receptor	IL6R	chr1	NM_000565	protein_coding	P25532
	45	IL8	39.578	77.902	3.75232	9.05896		interleukin_8	IL8		NM_000584
	46	ITGA2	3.099	1.456	5.63363	7.26561	3673	integrin__alpha_2__CD49B__alpha_2_subunit_of_VLA-2_receptor	ITGA2	chr5	NM_002203	protein_coding	P24297
	47	ITGA5	4.298	1.334	4.97485	7.07858	3678	integrin__alpha_5__fibronectin_receptor__alpha_polypeptide	ITGA5	chr12	NM_002205	protein_coding	P36133
	48	ITGB2	0.65	0.472	2.50919	1.88792	3689	integrin__beta_2__complement_component_3_receptor_3_and_4_subunit	ITGB2	chr21	NM_000211	protein_coding	P34766
	49	JAGN1	0.509	0.424	7.52287	6.54759	84522	jagunal_homolog_1__Drosophila	JAGN1	chr3	NM_032492	protein_coding	P28329
	50	JAK2	0.425	0.8	4.27158	3.03633	3717	Janus_kinase_2	JAK2	chr9	NM_004972	protein_coding	P5813
	51	LAMA5	0.456	0.282	6.93869	5.80547	3911	laminin__alpha_5	LAMA5	chr20	NM_005560	protein_coding	P27396
	52	LCP1	4.15	1.505	4.21047	6.26373	3936	lymphocyte_cytosolic_protein_1__L-plastin	LCP1	chr13	NM_002298	protein_coding	P21735
	53	LPAR1	0.358	0.753	4.83142	3.35106	1902	lysophosphatidic_acid_receptor_1	LPAR1	chr9	NM_001401	protein_coding	P25542
	54	MATN2	0.267	0.376	5.09085	3.1865	4147	matrilin_2	MATN2	chr8	NM_002380	protein_coding	P2436
	55	MMP1	3.214	5.219	5.20269	6.887	4312	matrix_metallopeptidase_1__interstitial_collagenase	MMP1	chr11	NM_002421	protein_coding	P19367
	56	NR2F2	0.452	0.802	4.81394	3.66744	7026	nuclear_receptor_subfamily_2__group_F__member_2	NR2F2	chr15	NM_021005	protein_coding	P19047
	57	NRG1	3.338	5.389	3.97874	5.71768	3084	neuregulin_1	NRG1	chr8	NM_013956	protein_coding	P3717
	58	NRP1	2.49	0.734	4.36268	5.67875	8829	neuropilin_1	NRP1	chr10	NM_003873	protein_coding	P31661
	59	NTN1	0.438	0.229	4.11836	2.92657	9423	netrin_1	NTN1	chr17	NM_004822	protein_coding	P26097
	60	NUP85	0.474	0.437	5.69229	4.61536	79902	nucleoporin_85kDa	NUP85	chr17	NM_024844	protein_coding	P17046
	61	P2RY1	0.363	0.548	4.3302	2.86849	5028	purinergic_receptor_P2Y__G-protein_coupled__1	P2RY1	chr3	NM_002563	protein_coding	P4926
	62	PAK6	0.386	0.313	5.34763	3.97334	56924	p21_protein__Cdc42_Rac_-activated_kinase_6	PAK6	chr15	NM_001128628	protein_coding	P34040
	63	PALLD	0.827	0.075	2.53779	2.26364	23022	palladin__cytoskeletal_associated_protein	PALLD	chr4	NM_001166108	protein_coding	P34750
	64	PARP9	0.376	0.424	4.64599	3.23327	83666	poly__ADP-ribose__polymerase_family__member_9	PARP9	chr3	NM_031458	protein_coding	P21722
	65	PAXIP1	0.48	0.465	5.72699	4.66744	22976	PAX_interacting__with_transcription-activation_domain__protein_1	PAXIP1	chr7	NM_007349	protein_coding	P32269
	66	PDPN	0.378	0.583	4.55759	3.15445	10630	podoplanin	PDPN	chr1	NM_006474	protein_coding	P15647
	67	PHACTR4	0.95	0.355	5.6891	5.61539	65979	phosphatase_and_actin_regulator_4	PHACTR4	chr1	NM_001048183	protein_coding	P14295
	68	PIK3R2	0.424	0.528	6.55899	5.32261	5296	phosphoinositide-3-kinase__regulatory_subunit_2__beta	PIK3R2	chr19	NM_005027	protein_coding
	69	PIP5K1C	0.942	0.416	4.49307	4.40667	23396	phosphatidylinositol-4-phosphate_5-kinase__type_I__gamma	PIP5K1C	chr19	NM_012398	protein_coding	P5304
	70	PKN3	0.558	0.295	4.92139	4.07963	29941	protein_kinase_N3	PKN3	chr9	NM_013355	protein_coding	P35017
	71	PLAU	2.935	3.046	6.82676	8.38008	5328	plasminogen_activator__urokinase	PLAU	chr10	NM_002658	protein_coding	P12365
	72	PLCG1	0.441	0.382	6.68311	5.50214	5335	phospholipase_C__gamma_1	PLCG1	chr20	NM_002660	protein_coding	P26938
	73	PTK2B	4.417	0.94	4.82563	6.96878	2185	protein_tyrosine_kinase_2_beta	PTK2B	chr8	NM_173176	protein_coding	P26538
	74	PTK7	0.508	0.381	7.18554	6.20819	5754	protein_tyrosine_kinase_7	PTK7	chr6	NM_002821	protein_coding	P21322
	75	PXN	2.156	1.076	7.79534	8.90368	5829	paxillin	PXN	chr12	NM_001080855	protein_coding	P1974
	76	RHBDF1	0.458	0.664	5.9912	4.86364	64285	rhomboid_5_homolog_1__Drosophila	RHBDF1	chr16	NM_022450	protein_coding	P6373
	77	S100P	36.875	1.009	1.31499	6.51954	6286	S100_calcium_binding_protein_P	S100P	chr4	NM_005980	protein_coding	P5556
	78	SAA2	1.2	3.347	0	0.263034	6289	serum_amyloid_A2	SAA2	chr11	NM_001127380	protein_coding	P19578
	79	SDC3	0.502	0.496	3.45391	2.45996	9672	syndecan_3	SDC3	chr1	NM_014654	protein_coding	P24809
	80	SEMA3F	0.261	0.35	4.89942	2.96403	6405	sema_domain__immunoglobulin_domain__Ig__short_basic_domain__secreted__semaphorin__3F	SEMA3F	chr3	NM_004186	protein_coding	P21711
	81	SEMA4C	0.491	0.758	5.36377	4.33693	54910	sema_domain__immunoglobulin_domain__Ig__transmembrane_domain__TM__and_short_cytoplasmic_domain__semaphorin__4C	SEMA4C	chr2	NM_017789	protein_coding	P19957
	82	SEMA5A	1	0.494	0	0	9037	sema_domain__seven_thrombospondin_repeats__type_1_and_type_1-like__transmembrane_domain__TM__and_short_cytoplasmic_domain__semaphorin__5A	SEMA5A	chr5	NM_003966	protein_coding	P32153
	83	SH3KBP1	3.734	0.876	3.45391	5.3547	30011	SH3-domain_kinase_binding_protein_1	SH3KBP1	chrX	NM_031892	protein_coding	P30580
	84	SIX1	0.421	0.878	4.40224	3.15445	6495	SIX_homeobox_1	SIX1	chr14	NM_005982	protein_coding	P23752
	85	SLC3A2	1.936	3.155	8.76159	9.7146	6520	solute_carrier_family_3__amino_acid_transporter_heavy_chain__member_2	SLC3A2	chr11	NM_002394	protein_coding	P15170
	86	SLC9A1	2.314	1.503	5.986	7.19644	6548	solute_carrier_family_9__subfamily_A__NHE1__cation_proton_antiporter_1__member_1	SLC9A1	chr1	NM_003047	protein_coding
	87	SMO	0.193	0.299	4.86012	2.48594	6608	smoothened__frizzled_family_receptor	SMO	chr7	NM_005631	protein_coding	P34945
	88	SNAI2	4.74	1.478	6.2211	8.46586	6591	snail_family_zinc_finger_2	SNAI2	chr8	NM_003068	protein_coding	P19407
	89	SOS1	0.616	0.335	3.26078	2.5612	6654	son_of_sevenless_homolog_1__Drosophila	SOS1	chr2	NM_005633	protein_coding	P8192
	90	SOX1	0.377	0.344	4.42553	3.01846	6656	SRY__sex_determining_region_Y_-box_1	SOX1	chr13	NM_005986	protein_coding	P17154
	91	SRC	1.263	0.451	5.07622	5.41346	6714	v-src_avian_sarcoma__Schmidt-Ruppin_A-2__viral_oncogene_homolog	SRC	chr20	NM_198291	protein_coding	P18812
	92	SYNE2	0.56	0.448	7.17871	6.34232	23224	spectrin_repeat_containing__nuclear_envelope_2	SYNE2	chr14	NM_182914	protein_coding	P20637
	93	TAOK2	0.475	0.316	6.80034	5.72588	9344	TAO_kinase_2	TAOK2	chr16	NM_016151	protein_coding	P30142
	94	THBS1	2.429	0.498	6.53782	7.81832	7057	thrombospondin_1	THBS1	chr15	NM_003246	protein_coding	P726
	95	TIAM1	1.488	0.482	2.48001	3.05381	7074	T-cell_lymphoma_invasion_and_metastasis_1	TIAM1	chr21	NM_003253	protein_coding	P25949
	96	TNFRSF12A	2.019	1.055	8.34956	9.3633	51330	tumor_necrosis_factor_receptor_superfamily__member_12A	TNFRSF12A	chr16	NM_016639	protein_coding	P1411
	97	TNK2	0.45	0.509	4.7722	3.62117	10188	tyrosine_kinase__non-receptor__2	TNK2	chr3	NM_001010938	protein_coding	P8493
	98	TNS1	0.4	0.354	3.97874	2.65604	7145	tensin_1	TNS1	chr2	NM_022648	protein_coding	P11698
	99	TNS3	0.256	0.333	5.35973	3.393	64759	tensin_3	TNS3	chr7	NM_022748	protein_coding	P15164
	100	TOP2B	0.455	0.387	5.30648	4.17057	7155	topoisomerase__DNA__II_beta_180kDa	TOP2B	chr3	NM_001068	protein_coding	P17665
	101	TWIST1	4.879	0.47	1.76723	4.05381	7291	twist_family_bHLH_transcription_factor_1	TWIST1	chr7	NM_000474	protein_coding	P2779
	102	TYRO3	0.472	0.547	4.71677	3.63297	7301	TYRO3_protein_tyrosine_kinase	TYRO3	chr15	NM_006293	protein_coding	P9145
	103	USP9Y	1	0.357	0	0	8287	ubiquitin_specific_peptidase_9__Y-linked	USP9Y	chrY	NM_004654	protein_coding	P5396
	104	VEGFA	5.293	4.703	7.23241	9.63642	7422	vascular_endothelial_growth_factor_A	VEGFA	chr6	NM_001171623	protein_coding	P5431
	105	VEGFC	2.092	1.738	4.04028	5.10501	7424	vascular_endothelial_growth_factor_C	VEGFC	chr4	NM_005429	protein_coding	P16660
	106	WNT7A	0.351	0.639	4.11836	2.60928	7476	wingless-type_MMTV_integration_site_family__member_7A	WNT7A	chr3	NM_004625	protein_coding	P18147

## Sheet: information
		Information
	Seq	Ampli-Seq
	organism	Human
	Normalization	ampliSeq RNA Plug in (ver 5.6.0.3)
		Color index
	Fold	Color	RGB
	>10		150.5.1
	>7.5		200.7.2
	>5		250.8.2
	>3		253.52.47
	>2		253.102.98
	>1.75		254.152.148
	>1.5		255.202.201
	>1.25		255.230.229
	1		255.255.255
	<0.8		232.229.255
	<0.6666666		205.205.205
	<0.5714286		152.162.254
	<0.5		88.104.254
	<0.3333333		39.59.253
	<0.2		2.25.244
	<0.1333333		1.14.137
	<0.1		1.9.83
