# Supplementary material for: Cannabidiol enhances cytotoxicity of anti-cancer drugs in human head and neck squamous cell carcinoma
Source: Sci Rep. 2020 Nov 26;10:20622. doi: 10.1038/s41598-020-77674-y (PMC7692486; doi:10.1038/s41598-020-77674-y)
Supplement: Supplementary file 3 — Supplementary Table S3. [file 41598_2020_77674_MOESM3_ESM.xlsx]

## Sheet: inflammatory response genes
	Table SI 3. List of inflammatory response genes in CBD treated FaDu and SCC15
			Fold change		Log2(normalized RC)
		Gene symbol	FaDu	SCC15	FaDu	SCC15	Entrez ID	Description	Gene ID	Chromosome	Transcript ID	Biotype	Protein ID
	1	IL8	39.578	77.902	3.75232	9.05896	3576	interleukin_8	IL8	chr4	NM_000584	protein_coding	P10145
	2	CXCL2	10.35	37.253	2.67356	6.04509	2920	chemokine__C-X-C_motif__ligand_2	CXCL2	chr4	NM_002089	protein_coding	P1471
	3	CXCL1	2.708	27.75	4.52926	5.96648	2919	chemokine__C-X-C_motif__ligand_1__melanoma_growth_stimulating_activity__alpha	CXCL1	chr4	NM_001511	protein_coding	P9022
	4	TNFAIP3	10.145	24.47	6.08177	9.42445	7128	tumor_necrosis_factor__alpha-induced_protein_3	TNFAIP3	chr6	NM_006290	protein_coding	P24287
	5	CXCL3	11.253	17.576	0.543991	4.03624	2921	chemokine__C-X-C_motif__ligand_3	CXCL3	chr4	NM_002090	protein_coding	P30282
	6	NFKBIZ	4.702	10.49	5.26412	7.49735	64332	nuclear_factor_of_kappa_light_polypeptide_gene_enhancer_in_B-cells_inhibitor__zeta	NFKBIZ	chr3	NM_031419	protein_coding	P7811
	7	ELF3	0.557	7.257	6.5289	5.6844	1999	E74-like_factor_3__ets_domain_transcription_factor__epithelial-specific	ELF3	chr1	NM_004433	protein_coding	P6246
	8	CEBPB	2.79	5.886	2.93338	4.41346	1051	CCAAT_enhancer_binding_protein__C_EBP__beta	CEBPB	chr20	NM_005194	protein_coding	P14101
	9	IL1A	13.83	5.76	3.67694	7.46667	3552	interleukin_1__alpha	IL1A	chr2	NM_000575	protein_coding	P2572
	10	PTGS2	163.446	4.503	1.76723	9.1199	5743	prostaglandin-endoperoxide_synthase_2__prostaglandin_G_H_synthase_and_cyclooxygenase	PTGS2	chr1	NM_000963	protein_coding	P4717
	11	SAA2	1.2	3.347	0	0.263034	6289	serum_amyloid_A2	SAA2	chr11	NM_001127380	protein_coding	P19578
	12	NLRP10	1.5	3.299	0	0.584963	338322	NLR_family__pyrin_domain_containing_10	NLRP10	chr11	NM_176821	protein_coding	P10715
	13	IRAK2	3.16	3.063	1.24732	2.90747	3656	interleukin-1_receptor-associated_kinase_2	IRAK2	chr3	NM_001570	protein_coding	P24025
	14	IL1B	3.029	2.866	5.4756	7.0743	3553	interleukin_1__beta	IL1B	chr2	NM_000576	protein_coding	P29920
	15	NGFR	0.168	2.855	4.74787	2.17057	4804	nerve_growth_factor_receptor	NGFR	chr17	NM_002507	protein_coding	P18090
	16	IL6R	3.288	2.751	4.10886	5.82596	3570	interleukin_6_receptor	IL6R	chr1	NM_000565	protein_coding	P25532
	17	MGLL	1.602	2.723	1.90574	2.58544	11343	monoglyceride_lipase	MGLL	chr3	NM_001003794	protein_coding	P10288
	18	RELB	1.513	2.673	4.21047	4.80802	5971	v-rel_avian_reticuloendotheliosis_viral_oncogene_homolog_B	RELB	chr19	NM_006509	protein_coding	P29554
	19	ZC3H12A	3.046	2.66	2.99675	4.60354	80149	zinc_finger_CCCH-type_containing_12A	ZC3H12A	chr1	NM_025079	protein_coding	P14311
	20	ADAM8	3.504	2.279	3.78869	5.59762	101	ADAM_metallopeptidase_domain_8	ADAM8	chr10	NM_001109	protein_coding	P23125
	21	SPHK1	8.234	2.036	3.98914	7.03081	8877	sphingosine_kinase_1	SPHK1	chr17	NM_182965	protein_coding	P8663
	22	NFKB2	1.472	2.009	5.93833	6.49574	4791	nuclear_factor_of_kappa_light_polypeptide_gene_enhancer_in_B-cells_2__p49_p100	NFKB2	chr10	NM_001077494	protein_coding	P19451
	23	F3	3.35	0.78	8.6802	10.4243	2152	coagulation_factor_III__thromboplastin__tissue_factor	F3	chr1	NM_001993	protein_coding	P15337
	24	THBS1	2.429	0.498	6.53782	7.81832	7057	thrombospondin_1	THBS1	chr15	NM_003246	protein_coding	P726
	25	ANXA1	2.605	1.432	9.29311	10.6743	301	annexin_A1	ANXA1	chr9	NM_000700	protein_coding	P24461
	26	NFE2L2	2.295	0.884	6.86126	8.05977	4780	nuclear_factor__erythroid_2-like_2	NFE2L2	chr2	NM_006164	protein_coding	P14241
	27	ACVR1	2.231	0.888	5.00086	6.15854	90	activin_A_receptor__type_I	ACVR1	chr2	NM_001111067	protein_coding	P29591
	28	BLNK	2.093	0.676	3.95764	5.02303	29760	B-cell_linker	BLNK	chr10	NM_013314	protein_coding
	29	KDM6B	2.033	1.336	5.46444	6.48773	23135	lysine__K_-specific_demethylase_6B	KDM6B	chr17	NM_001080424	protein_coding	P32004
	30	TPST1	0.908	0.495	3.27784	3.13816	8460	tyrosylprotein_sulfotransferase_1	TPST1	chr7	NM_003596	protein_coding	P31459
	31	DAB2IP	0.5	0.478	6.78695	5.78728	153090	DAB2_interacting_protein	DAB2IP	chr9	NM_032552	protein_coding	P7062
	32	NDST1	0.355	0.474	7.10385	5.60949	3340	N-deacetylase_N-sulfotransferase__heparan_glucosaminyl__1	NDST1	chr5	NM_001543	protein_coding	P2164
	33	ITGB2	0.65	0.472	2.50919	1.88792	3689	integrin__beta_2__complement_component_3_receptor_3_and_4_subunit	ITGB2	chr21	NM_000211	protein_coding	P34766
	34	CD40	0.653	0.464	1.10098	0.485427	958	CD40_molecule__TNF_receptor_superfamily_member_5	CD40	chr20	NM_001250	protein_coding	P27401
	35	APOL3	0.2	0.448	3.99955	1.67852	80833	apolipoprotein_L__3	APOL3	chr22	NM_145640	protein_coding	P2427
	36	AFAP1L2	0.841	0.376	3.51299	3.26364	84632	actin_filament_associated_protein_1-like_2	AFAP1L2	chr10	NM_001001936	protein_coding	P23788
	37	PYCARD	0.463	0.855	4.76617	3.65604	29108	PYD_and_CARD_domain_containing	PYCARD	chr16	NM_013258	protein_coding	P24872
	38	IL10RB	0.453	0.571	5.29811	4.15445	3588	interleukin_10_receptor__beta	IL10RB	chr21	NM_000628	protein_coding	P6609
	39	TUSC2	0.446	1.005	5.36776	4.20226	11334	tumor_suppressor_candidate_2	TUSC2	chr3	NM_007275	protein_coding	P7156
	40	LIPA	0.43	0.582	6.31119	5.09238	3988	lipase_A__lysosomal_acid__cholesterol_esterase	LIPA	chr10	NM_001127605	protein_coding	P5405
	41	ITGB6	0.404	0.372	5.83218	4.52425	3694	integrin__beta_6	ITGB6	chr2	NM_000888	protein_coding	P15889
	42	F2R	0.464	0.359	4.48575	3.37921	2149	coagulation_factor_II__thrombin__receptor	F2R	chr5	NM_001992	protein_coding	P5949
	43	HFE	0.358	0.434	4.3302	2.8486	3077	HEMOCHROMATOSIS__TYPE_1__HFE1,MICROVASCULAR_COMPLICATIONS_OF_DIABETES__SUSCEPTIBILITY_TO__7__MVCD7,PORPHYRIA_VARIEGATA,TRANSFERRIN_SERUM_LEVEL_QUANTITATIVE_TRAIT_LOCUS_2__TFQTL2	HFE	chr6	NM_000410	protein_coding	P3923
		Information
	Seq	Ampli-Seq
	organism	Human
	Normalization	ampliSeq RNA Plug in (ver 5.6.0.3)
		Color index
	Fold	Color	RGB
	>10		150.5.1
	>7.5		200.7.2
	>5		250.8.2
	>3		253.52.47
	>2		253.102.98
	>1.75		254.152.148
	>1.5		255.202.201
	>1.25		255.230.229
	1		255.255.255
	<0.8		232.229.255
	<0.6666666		205.205.205
	<0.5714286		152.162.254
	<0.5		88.104.254
	<0.3333333		39.59.253
	<0.2		2.25.244
	<0.1333333		1.14.137
	<0.1		1.9.83

## Sheet: Sheet1
792	ANXA1	2.605	1.432	2.587	1.422	9.29311	10.6743	10.6643	11.1821	5472	16323	17041	23639	301	#FF6347,black	#FFE4c3,black	#FF6347,black	#FFE4c3,black	ANXA1	AMPL1652091	chr9	75766647	75785310	NM_000700	protein_coding	ANX1|LPC1	P24461	annexin_A1	.	533	201012_at	ANXA1
12148	NFE2L2	2.295	0.884	1.025	0.395	6.86126	8.05977	6.89724	6.71895	1007	2657	1242	1062	4780	#FF6347,black			#87CEEB,black	NFE2L2	AMPL28576834	chr2	178095031	178129859	NM_006164	protein_coding	NRF2	P14241	nuclear_factor__erythroid_2-like_2	.	7782	1567013_at,201146_at	NFE2L2
260	ACVR1	2.231	0.888	1.173	0.467	5.00086	6.15854	5.23055	5.05853	271	704	384	329	90	#FF6347,black			#87CEEB,black	ACVR1	AMPL4747801	chr2	158592958	158732374	NM_001111067	protein_coding	ACTRI|ACVR1A|ACVRLK2|ALK2|FOP|SKR1|TSRI	P29591	activin_A_receptor__type_I	FIBRODYSPLASIA_OSSIFICANS_PROGRESSIVA__FOP	171	203935_at	ACVR1
1587	BLNK	2.093	0.676	2.472	0.798	3.95764	5.02303	5.26311	4.698	127	315	393	254	29760	#FF6347,black	#E0FFFF,black	#FF6347,black	#E0FFFF,black	BLNK	AMPL12484544	chr10	97951455	98031273	NM_013314	protein_coding	AGM4|BASH|BLNK-S|LY57|MGC111051|SLP-65|SLP65		B-cell_linker	AGAMMAGLOBULINEMIA_4__AUTOSOMAL_RECESSIVE__AGM4	14211	207655_s_at	BLNK
8675	KDM6B	2.033	1.336	1.016	0.668	5.46444	6.48773	5.48778	5.90571	377	887	461	600	23135	#FF6347,black	#FFE4c3,black		#E0FFFF,black	KDM6B	AMPL4267679	chr17	7743235	7758118	NM_001080424	protein_coding	JMJD3|KIAA0346	P32004	lysine__K_-specific_demethylase_6B	.	29012	1556066_at,1556067_a_at,213146_at,229452_at,41386_i_at,41387_r_at	KDM6B
14816	PYCARD	0.463	0.855	1.653	3.049	4.76617	3.65604	5.49083	5.26431	229	116	462	381	29108	#87CEEB,black		#FFA07A,black	#FF6347,black	PYCARD	AMPL12613546	chr16	31212807	31214097	NM_013258	protein_coding	ASC|CARD5|MGC10332|TMS|TMS-1|TMS1	P24872	PYD_and_CARD_domain_containing	.	16608	221666_s_at	PYCARD
8137	IL10RB	0.453	0.571	0.775	0.978	5.29811	4.15445	4.93083	4.12168	335	168	310	167	3588	#87CEEB,black	#B0E0E6,black	#E0FFFF,black		IL10RB	AMPL4799358	chr21	34638665	34669539	NM_000628	protein_coding	CDW210B|CRF2-4|CRFB4|D21S58|D21S66|IL-10R2	P6609	interleukin_10_receptor__beta	HEPATITIS_B_VIRUS__SUSCEPTIBILITY_TO,INFLAMMATORY_BOWEL_DISEASE_25__AUTOSOMAL_RECESSIVE__IBD25	5965	209575_at	IL10RB
19215	TUSC2	0.446	1.005	0.55	1.239	5.36776	4.20226	4.50456	4.51172	352	174	228	222	11334	#87CEEB,black		#B0E0E6,black		TUSC2	AMPL13593470	chr3	50362340	50365669	NM_007275	protein_coding	C3orf11|FUS1|PAP|PDAP2	P7156	tumor_suppressor_candidate_2	.	17034	203272_s_at,203273_s_at	TUSC2
9557	LIPA	0.43	0.582	1.324	1.795	6.31119	5.09238	6.71582	5.93612	685	331	1094	613	3988	#87CEEB,black	#B0E0E6,black	#FFE4c3,black	#FFA07A,black	LIPA	AMPL6231800	chr10	90973326	91011796	NM_001127605	protein_coding	CESD|LAL	P5405	lipase_A__lysosomal_acid__cholesterol_esterase	LYSOSOMAL_ACID_LIPASE_DEFICIENCY	6617	1561557_at,201847_at,236156_at	LIPA
7540	HFE	0.358	0.434	0.452	0.548	4.3302	2.8486	3.18412	1.98112	167	62	85	30	3077	#87CEEB,black	#87CEEB,black	#87CEEB,black	#B0E0E6,black	HFE	AMPL3094287	chr6	26087509	26095469	NM_000410	protein_coding	HFE1|HH|HLA-H|MGC103790|MVCD7|dJ221C16.10.1	P3923	hemochromatosis	HEMOCHROMATOSIS__TYPE_1__HFE1,MICROVASCULAR_COMPLICATIONS_OF_DIABETES__SUSCEPTIBILITY_TO__7__MVCD7,PORPHYRIA_VARIEGATA,TRANSFERRIN_SERUM_LEVEL_QUANTITATIVE_TRAIT_LOCUS_2__TFQTL2	4886	1553402_a_at,206086_x_at,206087_x_at,210864_x_at,211326_x_at,211327_x_at,211328_x_at,211329_x_at,211330_s_at,211331_x_at,211332_x_at,211863_x_at,211866_x_at,214647_s_at,235754_at	HFE
